# Supplementary material
Source: PubMed Central journal article supplement (PMC5746862)

## **SUPPORTING INFORMATION FOR**

### **Parallel screening for rapid identification of orthogonal bioluminescent tools**

Colin M. Rathbun<sup>#,1</sup>, William B. Porterfield<sup>#,1</sup>, Krysten A. Jones<sup>#,2</sup>, Marian J. Sagoe<sup>1</sup>,  
Monique R. Reyes<sup>3</sup>, Christine T. Hua<sup>2</sup>, and Jennifer A. Prescher<sup>\*1-3</sup>

<sup>1</sup>Departments of Chemistry, <sup>2</sup>Molecular Biology & Biochemistry, and <sup>3</sup>Pharmaceutical  
Sciences, University of California Irvine, CA 92697, USA

<sup>#</sup> These authors contributed equally

\* Correspondence should be addressed to

J.A.P. (jpresche@uci.edu)

949-824-1706

### **TABLE OF CONTENTS**

|                       |             |
|-----------------------|-------------|
| Figures S1-S12        | Pages 2-8   |
| Table S1              | Pages 8-11  |
| Materials and Methods | Pages 12-19 |
| Synthetic Procedures  | Pages 20-22 |
| References            | Page 22     |
| NMR Spectra           | Pages 23-28 |

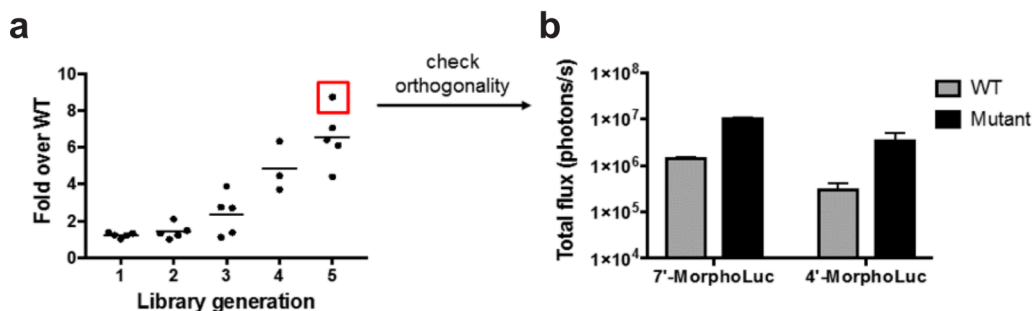

**Figure S1.** “Brighter” mutants can be evolved but are not orthogonal. (a) Fold increase in light emission tracked over five generations. Mutants were screened for total photon output with 7′-MorphoLuc. (b) The brightest mutant (red box in (a)) with 7′-MorphoLuc also exhibited increased photon output with 4′-MorphoLuc (black bars). Photon flux values for native Fluc (gray bars) are also shown. Imaging was performed in bacterial lysate (250 μM luciferin analogue).

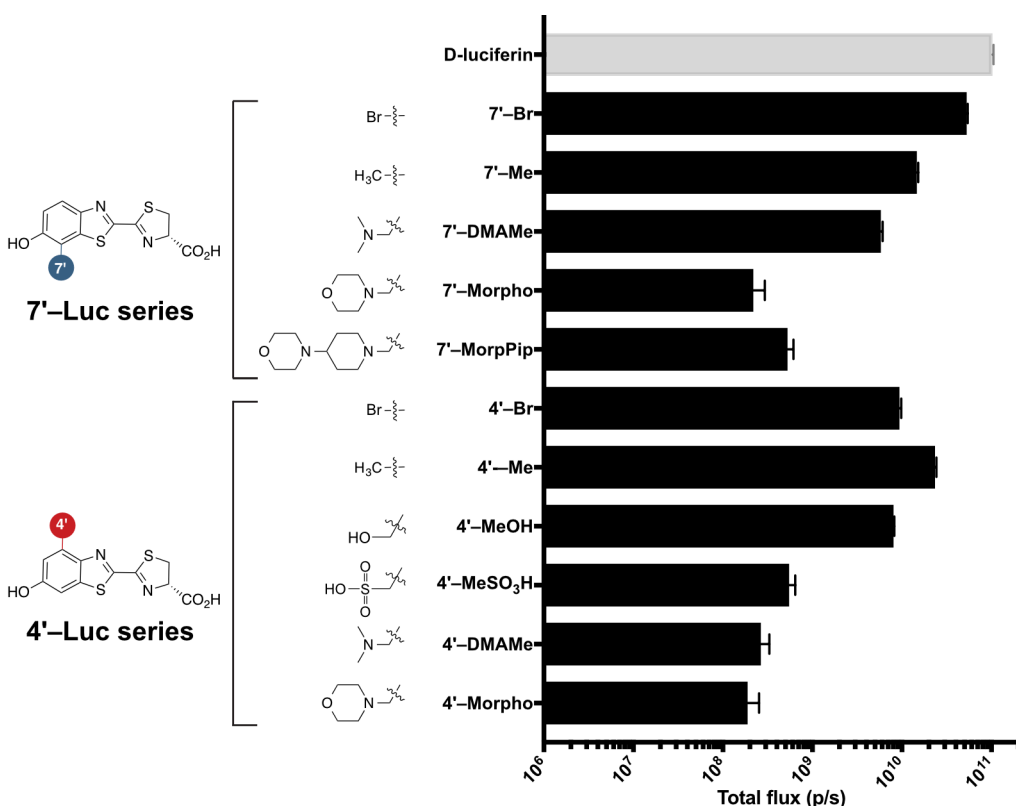

**Figure S2.** Sterically modified luciferins emit varying levels of photons with Fluc. Fluc (1 μg) was incubated with 100 μM luciferin analogue and photon outputs were measured. Error bars represent the standard error of the mean for n ≥ 3 independent experiments.

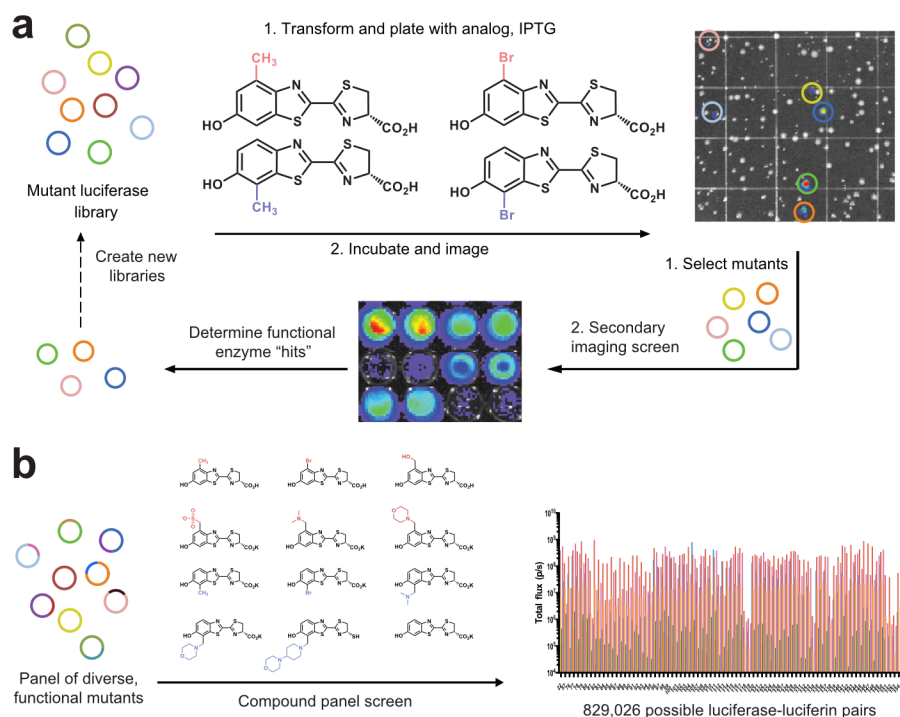

**Figure S3.** Screening for orthogonal pairs among enriched, functional luciferases. (a) Mutant luciferase libraries were generated and screened on-plate with minimally perturbed luciferins. Functional mutants were identified and analyzed by a secondary screen to determine “hits”. Some “hits” were pooled and subjected to further mutagenesis for additional screening. (b) A panel of 159 functionally diverse mutants (identified from (a)) was incubated with 12 luciferin analogues (in lysate) and imaged, generating 1908 individual data points. (A subset of light emission data is shown in the bar graph.) From this collection, 829,026 luciferase-luciferin pairs were possible.

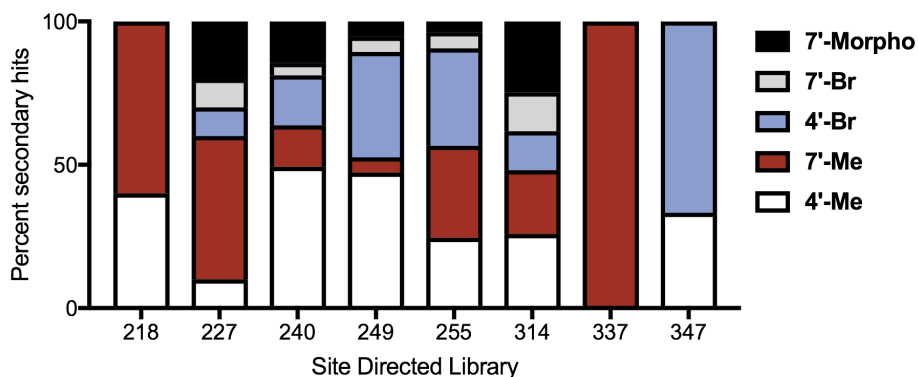

**Figure S4.** Distribution of “hits” identified from on-plate screens. Unique luciferases were identified from screens with minimally perturbed luciferin analogues.

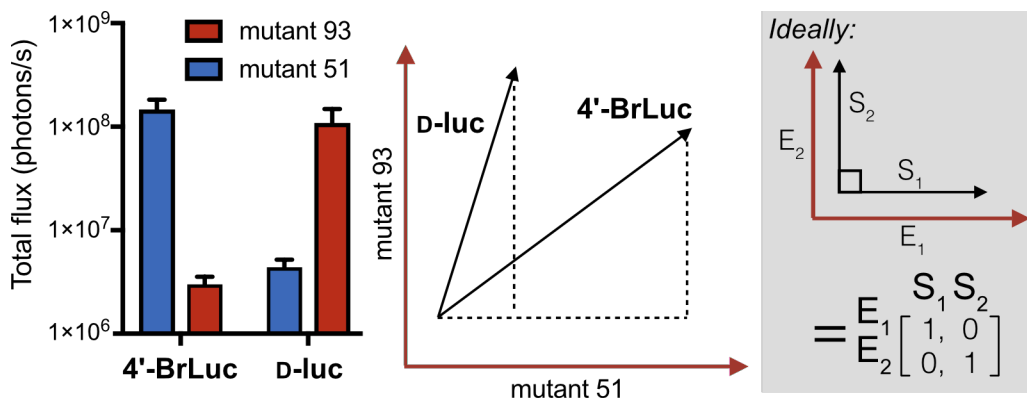

**Figure S5.** Vector analysis of light emission data. Imaging data with luciferase-luciferin pairs can be represented by vector units. Sample data with two mutants and analogues are shown. Perfect orthogonality is defined as the identity matrix.

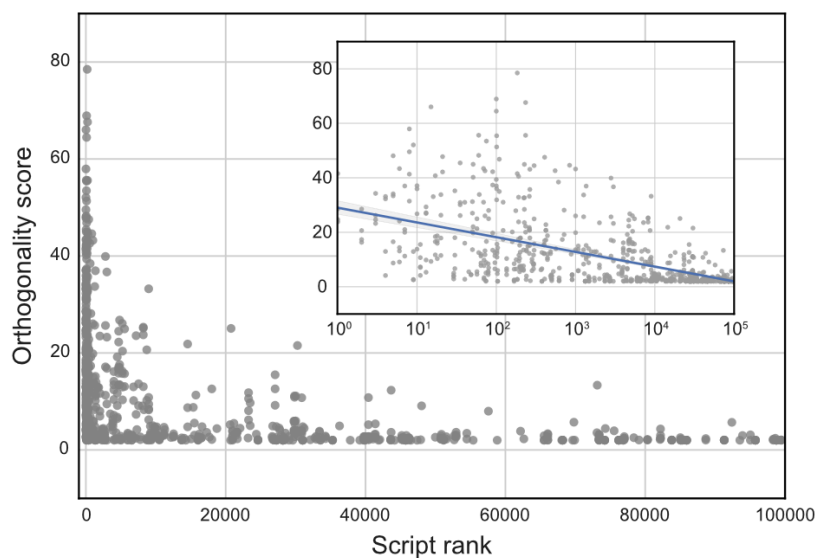

**Figure S6.** Biochemical verification of orthogonal pairs predicted from computer script. Each point compares the experimentally measured orthogonality score for a given pair with its rank predicted by the computer algorithm. (The inset shows the data plotted on a logarithmic scale). A clear positive relationship is observed; as the ranking increases, so does the observed orthogonality.

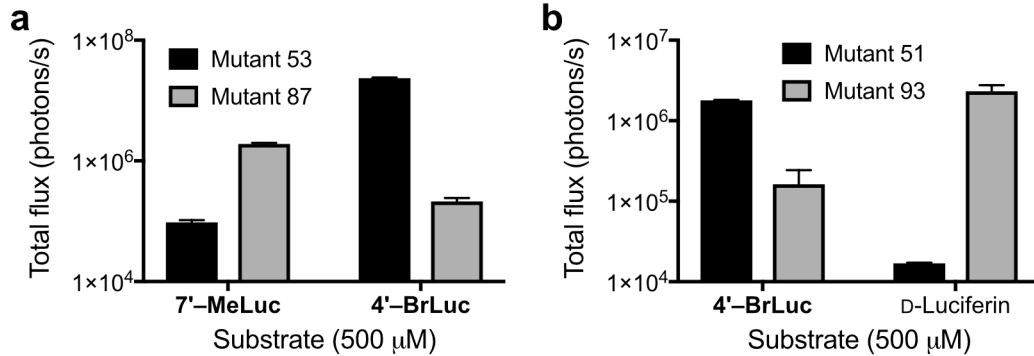

**Figure S7.** Multicellular imaging with orthogonal pairs. Lead pairings of (a) mutants 53 and 87 and (b) 51 and 93 maintain orthogonality in mammalian cell culture. In each case, 100,000 DB7 cells were treated with 500 μM luciferin analogue and imaged. Error bars represent SEM for experiments performed in triplicate.

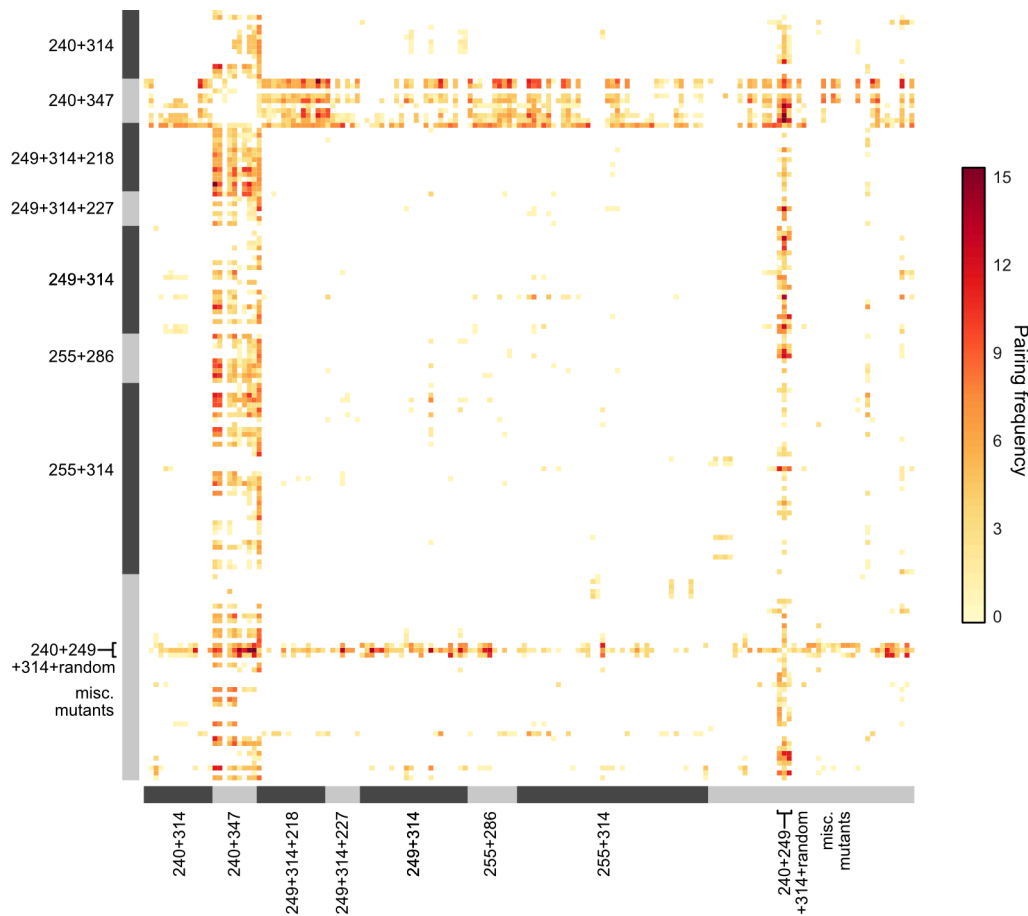

**Figure S8.** Origins of mutant enzymes that comprise orthogonal pairs. The top 5,000 *in silico* hits are shown, with each square representing an orthogonal pair. Each axis denotes Fluc residues targeted for mutagenesis. Mutants are grouped along each axis corresponding to their library of origin.

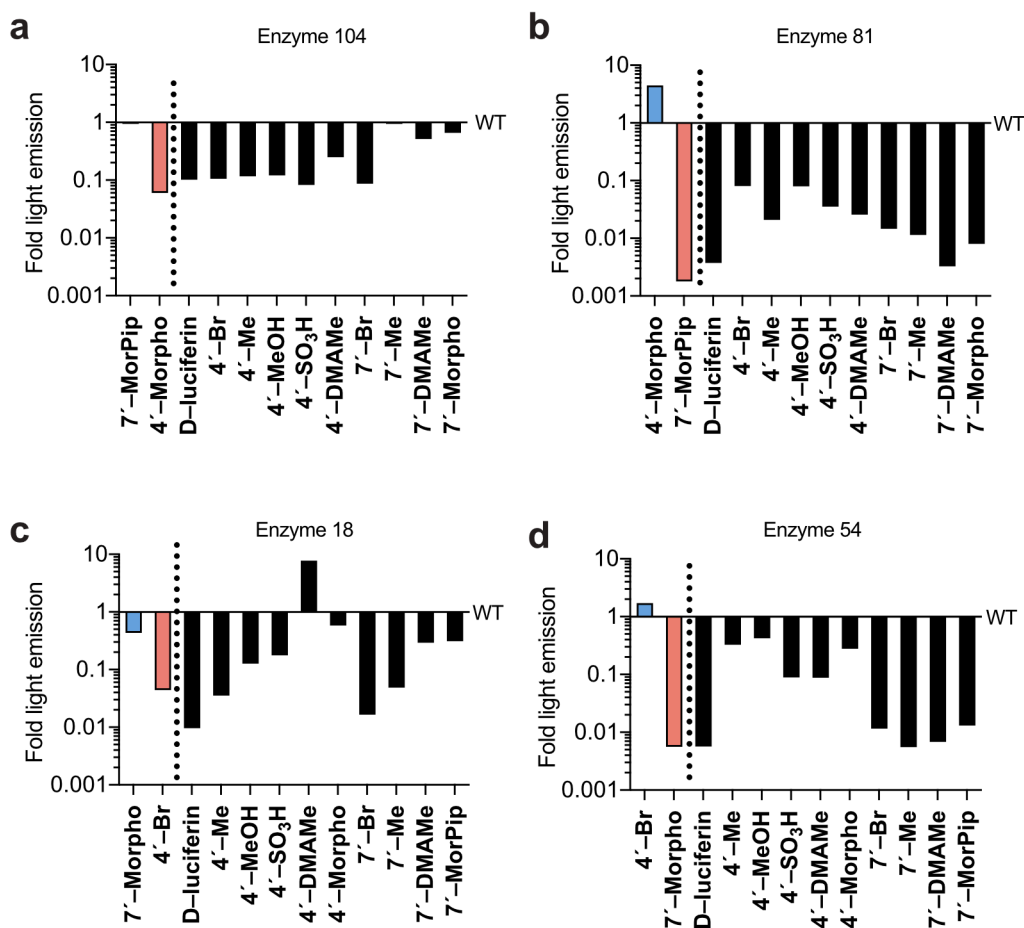

**Figure S9.** Selectivities of mutant enzymes for synthetic luciferins. Lead orthogonal enzymes (a) 104, (b) 81, (c) 18, and (d) 54 were treated with a panel of luciferin analogues and imaged. Light emission values are plotted as fold changes from Fluc with the respective compound (for normalization). The positive (blue) and negative (red) pairs are shown on the left side in each case.

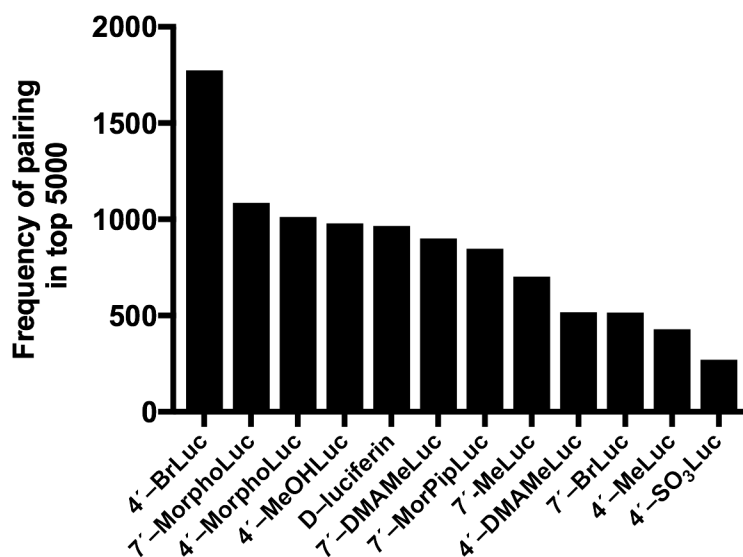

**Figure S10.** Propensity for orthogonality. Frequency of compounds appearing in the top 0.6% (5,000 out of 829,000) of orthogonal pairs.

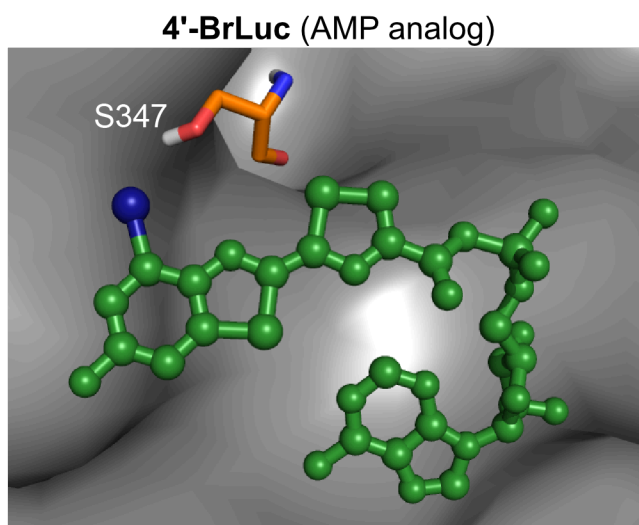

**Figure S11.** AutoDock analysis with 4'-BrLuc in native Fluc. Potential steric clash revealed between bromo substituent (blue) on 4'-BrLuc (shown as AMP conjugate, green) and S347 in Fluc. This residue is mutated to Gly in enzymes 51 and 53, which process the analogue. PDB:4G36.

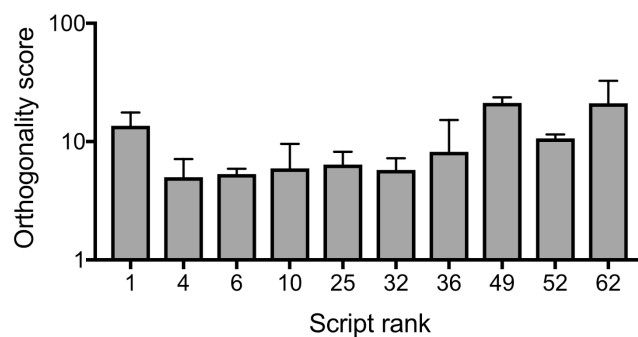

**Figure S12.** “Triplet” imaging with orthogonal pairs. Unique sets of three luciferase-luciferin pairs were identified. The top 10 unique triplet sets predicted *in silico* were verified *in vitro*. Bacteria expressing mutant enzymes were expanded, lysed and imaged with substrate. Orthogonality scores were measured as above. Error bars represent the standard error of the mean for n = 3 experiments.

**Table S1. List of mutant luciferases.**

| Mutant number | Name       | Sequence                                               |
|---------------|------------|--------------------------------------------------------|
| 1             | 4Me lead   | F227C, M249L, S314T, A348G                             |
| 2             | 7Br3C lead | R218H, F250T, S314C, Q338C                             |
| 3             | 7Br3L lead | R218H, F250T, S314C, Q338L                             |
| 4             | 7Br4C lead | R218H, F250T, S314C, G316T, Q338C                      |
| 5             | 7Br4V lead | R218H, F250T, S314C, G316T, Q338V                      |
| 13            | G3_7Mor_16 | M249F, T252S, F295L, S314T, G316T, A326V, P334S        |
| 14            | G3_7Mor_18 | M249L, S314V, G316S                                    |
| 15            | G3_7Mor_21 | M249L, S314C, G316A                                    |
| 16            | G3_7Mor_24 | M249F, Y266H, S293N, S314C, G316A                      |
| 17            | G3_7Mor_3  | M249F, F294S, S314T, G316T                             |
| 18            | G3_7Mor_36 | V240A, M249L, M265T, F295L, I301T, S314T, G316T, L321R |
| 19            | G3_7Mor_4  | M249L, F294L, D305E, S314T, G316T                      |
| 20            | G3_7Mor_46 | M249L, L267F, S314T, G316T                             |
| 21            | G3_7Mor_5  | M249F, S314T, G316T                                    |
| 22            | G3_7Mor_57 | M249F, Y266H, L295F, I312V                             |
| 23            | G3_7Mor_58 | V240A, M249L, L264F, S314T, G316T, K321R               |
| 24            | G3_7Mor_65 | M249L, Q283R, S314T, G316T                             |
| 25            | G3_7Mor_76 | I226V, V240A, M249L, I282T, F295L, S314T, G316T        |
| 26            | G3_7Mor_86 | I226V, M249F, D279N, S314T, G316T                      |
| 27            | G3_7Mor_88 | I232T, M249L, S314T, G316T                             |
| 28            | G3_7Mor_89 | M249F, I282V, H310R, S314T, G316T                      |
| 29            | G5_7Mor_14 | F227W, M249L, L286M, L287V, V288M, S314T, G316T        |
| 30            | G5_7Mor_4  | F227W, M249L, L287V, V288M, S314T, G316T               |
| 31            | G5_7Mor_5  | F227W, M249L, L287V, V288L, S314T, G316T               |
| 32            | G5_7Mor_7  | F227W, M249L, V288L, S314T, G316T                      |



| Mutant number | Name             | Sequence                                        |
|---------------|------------------|-------------------------------------------------|
| 33            | G5_7Mor_8        | F227Y, M249L, L286M, L287V, V288L, S314T, G316T |
| 34            | WT               | WT                                              |
| 35            | R218A            | R218A                                           |
| 36            | R218H            | R218H                                           |
| 37            | R218K            | R218K                                           |
| 38            | rand_4Mor_28     | T214A, E269G                                    |
| 39            | rand_4Mor_31     | K281E, F295L                                    |
| 40            | rand_4Mor_38     | T290A, F294S                                    |
| 41            | rand_4Mor_60     | I312V                                           |
| 42            | rand_4Mor_71     | H310R                                           |
| 43            | rand_4Mor_83     | E269G                                           |
| 44            | SD240+314_7Me_11 | V240I, V241A, S314T                             |
| 45            | SD240+314_7Me_13 | V240A, V241A, F247L, S314T                      |
| 47            | SD240+314_7Me_21 | V240A, F243M, S314T                             |
| 48            | SD240+314_7Me_32 | F243M, S314T                                    |
| 49            | SD240+314_7Me_40 | V240A, F247Y, S314T                             |
| 50            | SD240+347_4Br_1  | V240I, F247Y, S347G                             |
| 51            | SD240+347_4Br_12 | F243M, S347G                                    |
| 52            | SD240+347_4Br_17 | V240A, V241M, F243M, F247Y                      |
| 53            | SD240+347_4Br_6  | V240I, F243M, F247Y, S347G                      |
| 54            | SD240+347_4Me_14 | V241A, F247L, S347A                             |
| 55            | SD240+347_4Me_3  | V240L, V241L, F247Y, S347A                      |
| 56            | SD240+347_4Me_36 | V240M, F243M, F247Y, S347A                      |
| 57            | SD240+347_4Me_39 | V240G, F247Y, S347A                             |
| 58            | SD240+347_4Me_9  | F243M, F247Y, S347A                             |
| 59            | SD249+314_4Br_14 | S314C, G316T                                    |
| 60            | SD249+314_4Br_15 | S314T                                           |
| 61            | SD249+314_4Br_16 | M249L, S314C, G316S                             |
| 62            | SD249+314_4Br_18 | M249L, F250M, S314C                             |
| 63            | SD249+314_4Br_22 | M249L, S314C, G316A                             |
| 64            | SD249+314_4Br_3  | S314C, G316S                                    |
| 65            | SD249+314_4Br_38 | M249L, G316S                                    |
| 66            | SD249+314_4Br_43 | M249F, S314C, G316S                             |
| 67            | SD249+314_4Me_16 | F250Y, S314                                     |
| 68            | SD249+314_4Me_2  | F250M, S314T, G316T                             |
| 69            | SD249+314_4Me_21 | F250Y, S314T, G316T                             |
| 70            | SD249+314_4Me_24 | M249L, S314C                                    |
| 71            | SD249+314_4Me_47 | S314C, G316A                                    |
| 72            | SD249+314_4Me_5  | S314A, G316S                                    |
| 73            | SD249+314_4Me_51 | F250T, S314T, G316T                             |
| 74            | SD249+314_7Br_24 | F250H, S314C                                    |
| 75            | SD249+314_7Br_3  | F250T, S314C                                    |
| 76            | SD249+314_7Br_4  | F250T, S314C, G316T                             |
| 77            | SD249+314_7Me_21 | M249L, S314T                                    |
| 78            | SD249+314_7Me_25 | M249L, S314V                                    |
| 79            | SD249+314_7Me_4  | M249L, S314T, G316S                             |

| Mutant number | Name                 | Sequence                          |
|---------------|----------------------|-----------------------------------|
| 80            | SD249+314_7Me_5      | M249L, S314T, G316T               |
| 81            | SD249+314+218_4Me_1  | R218A, F250M, S314T, G316T        |
| 82            | SD249+314+218_4Me_13 | R218K, F250M, S314T, G316T        |
| 83            | SD249+314+218_4Me_15 | R218K, S314C, G316A               |
| 85            | SD249+314+218_4Me_25 | R218K, F250M, S314T, G316T        |
| 86            | SD249+314+218_4Me_27 | R218K, M249L, S314C               |
| 87            | SD249+314+218_4Me_34 | R218K, F250Y, S314T, G316T        |
| 88            | SD249+314+218_4Me_35 | R218K, F250M, S314C               |
| 89            | SD249+314+218_4Me_5  | R218K, S314T, G316T               |
| 90            | SD249+314+218_4Me_9  | R218K, F250Y, S314C               |
| 91            | SD249+314+218_7Me_2  | R218K, M249L, S314T               |
| 92            | SD249+314+218_7Me_24 | R218K, M249L, S314T, G316S        |
| 93            | SD249+314+218_7Me_27 | R218K, M249L, S314V               |
| 94            | SD249+314+218_7Me_30 | R218K, M249L, S314V, G316S        |
| 95            | SD249+314+227_4Br_1  | F227Y, M249L, F250Y, G316S        |
| 96            | SD249+314+227_4Br_2  | F227Y, M249L, S314C               |
| 97            | SD249+314+227_4Br_3  | F227Y, S314C, G316T               |
| 98            | SD249+314+227_4Br_5  | F227Y, S314T                      |
| 99            | SD249+314+227_4Br_6  | F227Y, S314C, G316A               |
| 100           | SD249+314+227_4Br_8  | F227Y, M249L, S314C, G316S        |
| 101           | SD249+314+227_7Br_1  | F227Y, F250H, S314C               |
| 102           | SD255+314_4Br_10     | Y255F, L256I, I257V, S314C        |
| 103           | SD255+314_4Br_11     | Y255H, I257V, S314C               |
| 104           | SD255+314_4Br_2      | L256I, I257F, S314T               |
| 105           | SD255+314_4Br_27     | L256I, I257F, S314C, G316S        |
| 107           | SD255+314_4Br_40     | Y255N, I257V, S314C, G316T        |
| 108           | SD255+314_4Br_42     | Y255H, I257V, S314C               |
| 109           | SD255+314_4Br_49     | Y255N, I257V, S314C               |
| 110           | SD255+314_4Br_5      | S347A                             |
| 111           | SD255+314_4Br_50     | L256I, I257F, S314C, G316T        |
| 112           | SD255+314_4Br_59     | not sequenced                     |
| 113           | SD255+314_4Br_61     | Y255H, I257V, G316S               |
| 114           | SD255+314_4Br_62     | Y255F, L256I, I257V, S314C, G316S |
| 115           | SD255+314_4Br_64     | L256M, I257C, S314C               |
| 116           | SD255+314_4Br_9      | Y255F, I257L, S314T               |
| 117           | SD255+314_4Me_1      | I257M, S314T                      |
| 118           | SD255+314_4Me_10-1   | I257S, 314V, G315H, G316R         |
| 119           | SD255+314_4Me_10-3   | Y255H, S314V                      |
| 120           | SD255+314_4Me_13     | I257A, S314C                      |
| 121           | SD255+314_4Me_18     | I257C, S314T, G316T               |
| 122           | SD255+314_4Me_6      | L256M, S314V, G316S               |
| 123           | SD255+314_4Me_7      | I257S, S314T, G316T               |
| 124           | SD255+314_7Br_10     | Y255F, I257L, S314C, G316T        |
| 125           | SD255+314_7Br_15     | Y255F, I257L, S314V, G316T        |
| 126           | SD255+314_7Br_3      | Y255F, I257L, S314C, G316A        |
| 127           | SD255+314_7Br_5      | Y255F, I257L, S314C, G316S        |

| Mutant number | Name             | Sequence                          |
|---------------|------------------|-----------------------------------|
| 128           | SD255+314_7Br_6  | Y255F, I257L, S314V, G316S        |
| 129           | SD255+314_7Br_8  | Y255F, I257L, S314C               |
| 130           | SD255+314_7Me_14 | I257R, S314T, G316S               |
| 131           | SD255+314_7Me_21 | Y255H, I257R, S314C, G316A        |
| 132           | SD255+314_7Me_22 | Y255H, I257S, S314V               |
| 133           | SD255+314_7Me_25 | Y255F, I257L, G316S               |
| 134           | SD255+314_7Me_27 | not sequenced                     |
| 135           | SD255+314_7Me_29 | Y255F, I257M, S314C, G316A        |
| 136           | SD255+314_7Me_31 | Y255H, I257L, S314T, G316T        |
| 137           | SD255+314_7Me_35 | Y255F, I257M, S314V, G316S        |
| 138           | SD255+314_7Me_36 | Y255F, I257L, S314A, G316S        |
| 139           | SD255+314_7Me_37 | Y255F, I257L, G316A               |
| 140           | SD255+314_7Me_48 | Y255H, I257R, S314T, G316S        |
| 141           | SD255+314_7Me_8  | L256M, I257F, S314T, G316T        |
| 142           | SD240+314_4Br_1  | V240L, V241F, F247S, S314C, G316A |
| 143           | SD240+314_4Br_8  | V240A, V241A, S314C, G316S        |
| 144           | SD240+314_4Me_1  | V241A, F247Y, S314T, G316T        |
| 145           | SD240+314_4Me_6  | V241A, F243L, F247Y, S314C        |
| 146           | SD240+314_4Me_15 | V241A, F247L, S314T, G316T        |
| 147           | SD240+314_7Me_2  | V240M, V241M, F247Y, S314V        |
| 148           | SD240+314_7Me_5  | V240A, V241A, F247L, S314C, G316A |
| 149           | SD240+314_7Me_13 | F243M, G316S                      |
| 150           | SD240+314_7Me_16 | F243M                             |
| 156           | SD255+286_4Me113 | Y255H, L286V, L287M, V288A        |
| 157           | SD255+286_4Me143 | L256I, I257M, L286V, V288A        |
| 158           | SD255+286_7Me30  | L256M, I257F, L286I, L287V, V288L |
| 159           | SD255+286_7Me31  | Y255I, I257C, L287V, V288A        |

## Materials and methods

### General bioluminescence imaging

All analyses were performed in black 96-well plates (Greiner Bio One). Plates containing luminescent reagents were imaged in a light-proof chamber with an IVIS Lumina (Xenogen) CCD camera chilled to -90 °C. The stage was kept at 37 °C during the imaging session, and the camera was controlled using Living Image software. Exposure times ranged from 1 s to 5 min, with data binning levels set to small or medium. Regions of interest were selected for quantification and total flux values were analyzed using Living Image software.

### Construction of luciferase libraries

Two sections of the luciferase gene (*pgl4-luc2*), denoted R1 and R2, were targeted for gene assembly as described in Jones *et al.*<sup>1</sup> To assemble mutant libraries, primers containing the codon(s) of interest (Supplementary Tables 2-9) were used in place of the primer coding for the wild-type sequence. Other libraries were created using standard QuikChange PCR techniques (Supplementary Table 10). All PCR reactions were run using Q5 Hot-start DNA polymerase (New England BioLabs).

Libraries were inserted into linearized template vectors pET28-R1del or pET28-R2del as described in Jones *et al.*<sup>1</sup> Library inserts were assembled with linearized pET vectors using circular polymerase extension cloning (CPEC) as described in Jones *et al.*<sup>1</sup> or by Gibson assembly. Gibson assembly master mixes were prepared following the Prather recipe on [http://www.openwetware.org/wiki/Gibson\\_Assembly](http://www.openwetware.org/wiki/Gibson_Assembly), with all materials purchased from New England BioLabs. For each assembly, 50 ng of *DpnI* digested, linearized vector was combined with insert (2:1 to 8:1 insert:vector ratios) and added to 10 µL of master mix. The mixtures were incubated at 50 °C for 20-60 min, then 1-3 µL was transformed into chemically competent cells (Top10 or DH5α *E. coli*). Transformants were plated on square, agar plates containing kanamycin. Cells were plated to exceed 3X the library size. Cells were scraped off of the plates, combined, and pelleted. DNA was isolated via miniprep and saved for agar-plate screening.

**Supplementary Tables 2-10:** Primers used to construct site-directed (SD) libraries. The bases highlighted in red denote sites targeted for saturation mutagenesis.

| Supplementary Table 2: SD218 primers |                                       |
|--------------------------------------|---------------------------------------|
| Forward primers                      |                                       |
| SD218-F1                             | GCACCGCACCGCTTGTGTCKGGTTCAGTCATGCCC   |
| SD218-F2                             | GCACCGCACCGCTTGTGTCKWTTTCAGTCATGCCC   |
| SD218-F3                             | GCACCGCACCGCTTGTGTCVHGTTCAGTCATGCCC   |
| SD218-F4                             | GCACCGCACCGCTTGTGTCKNATTCAGTCATGCCC   |
| Reverse primers                      |                                       |
| SD218-R1                             | GCCGAAGATGGGGTCGCGGGCATGACTGAAACCMGAC |
| SD218-R2                             | GCCGAAGATGGGGTCGCGGGCATGACTGAAAMWGAC  |
| SD218-R3                             | GCCGAAGATGGGGTCGCGGGCATGACTGAAACDBGAC |
| SD218-R4                             | GCCGAAGATGGGGTCGCGGGCATGACTGAAATNGAC  |

| Supplementary Table 3: SD227 primers |                                      |
|--------------------------------------|--------------------------------------|
| Forward primers                      |                                      |
| SD227-F1                             | GCGACCCCATCTGKGGCAACCAGATCATCCCCGACA |
| SD227-F2                             | GCGACCCCATCVBCGGCAACCAGATCATCCCCGACA |
| SD227-F3                             | GCGACCCCATCATGGCAACCAGATCATCCCCGACA  |
| SD227-F4                             | GCGACCCCATCNAWGGCAACCAGATCATCCCCGACA |
| Reverse primers                      |                                      |
| SD227-R1                             | GCCMCAGATGGGGTCGCGGGCATGACTGAATCGGAC |
| SD227-R2                             | GCCGVBGATGGGGTCGCGGGCATGACTGAATCGGAC |
| SD227-R3                             | GCCCATGATGGGGTCGCGGGCATGACTGAATCGGAC |
| SD227-R4                             | GCCWTNGATGGGGTCGCGGGCATGACTGAATCGGAC |

| Supplementary Table 4: SD240 primers |                                             |
|--------------------------------------|---------------------------------------------|
| Forward primers                      |                                             |
| SD240-F1                             | CCGCTATCCTCAGCGBCGBCCCAGBCCACCACGGC         |
| SD240-F2                             | CCGCTATCCTCAGCGBCGBCCCAWTKCACCACGGC         |
| SD240-F3                             | CCGCTATCCTCAGCGBCWTKCCAGBCCACCACGGC         |
| SD240-F4                             | CCGCTATCCTCAGCWTKGBCCCAGBCCACCACGGC         |
| SD240-F5                             | CCGCTATCCTCAGCWTKWTKCCAGBCCACCACGGC         |
| SD240-F6                             | CCGCTATCCTCAGCWTKGBCCCAWTKCACCACGGC         |
| SD240-F7                             | CCGCTATCCTCAGCGBCWTKCCAWTKCACCACGGC         |
| SD240-F8                             | CCGCTATCCTCAGCWTKWTKCCAWTKCACCACGGC         |
| SD240-F9                             | NDTGGCATGTTACCACGCTGGGCTACTTGATCTGCG        |
| SD240-F10                            | VHGGGCATGTTACCACGCTGGGCTACTTGATCTGCG        |
| SD240-F11                            | TGGGGCATGTTACCACGCTGGGCTACTTGATCTGCG        |
| Reverse primers                      |                                             |
| SD240-R1                             | GVCGVCGCTGAGGATAGCGGTGTCGGGGATGATCTGGT<br>T |
| SD240-R2                             | MAWMAWGCTGAGGATAGCGGTGTCGGGGATGATCTG<br>GTT |
| SD240-R3                             | MAWGVCGCTGAGGATAGCGGTGTCGGGGATGATCTGG<br>TT |
| SD240-R4                             | GVCMAWGCTGAGGATAGCGGTGTCGGGGATGATCTGG<br>TT |
| SD240-R5                             | CGTGGTGAACATGCCAHNGCCGTGGTGGVCTGG           |
| SD240-R6                             | CGTGGTGAACATGCCCDBGCCGTGGTGGVCTGG           |
| SD240-R7                             | CGTGGTGAACATGCCCAGCCGTGGTGGVCTGG            |

|           |                                                |
|-----------|------------------------------------------------|
| SD240-R8  | CGTGGTGAACATGCCAHNGCCGTGGTGM <del>AW</del> TGG |
| SD240-R9  | CGTGGTGAACATGCCCDBGCCGTGGTGM <del>AW</del> TGG |
| SD240-R10 | CGTGGTGAACATGCCCCAGCCGTGGTGM <del>AW</del> TGG |

| Supplementary Table 5: SD249 primers |                                                  |
|--------------------------------------|--------------------------------------------------|
| Forward primers                      |                                                  |
| SD249-F1                             | CACGGCTTCGGCGBCNDTNDTACGCTGGGCTACTTGAT<br>CTGCGG |
| SD249-F2                             | CACGGCTTCGGCGBCNDTVHACGCTGGGCTACTTGAT<br>CTGCGG  |
| SD249-F3                             | CACGGCTTCGGCGBCNDTTGGACGCTGGGCTACTTGAT<br>CTGCGG |
| SD249-F4                             | CACGGCTTCGGCGBCVHGNDTACGCTGGGCTACTTGAT<br>CTGCGG |
| SD249-F5                             | CACGGCTTCGGCGBCVHGVHACGCTGGGCTACTTGAT<br>CTGCGG  |
| SD249-F6                             | CACGGCTTCGGCGBCVHGTGGACGCTGGGCTACTTGAT<br>CTGCGG |
| SD249-F7                             | CACGGCTTCGGCGBCTGGNDTACGCTGGGCTACTTGAT<br>CTGCGG |
| SD249-F8                             | CACGGCTTCGGCGBCTGGVHACGCTGGGCTACTTGAT<br>CTGCGG  |
| SD249-F9                             | CACGGCTTCGGCGBCTGGTGGACGCTGGGCTACTTGAT<br>CTGCGG |
| SD249-F10                            | CACGGCTTCGGCWTKNDTNDTACGCTGGGCTACTTGAT<br>CTGCGG |
| SD249-F11                            | CACGGCTTCGGCWTKNDTVHACGCTGGGCTACTTGAT<br>CTGCGG  |
| SD249-F12                            | CACGGCTTCGGCWTKNDTTGGACGCTGGGCTACTTGAT<br>CTGCGG |
| SD249-F13                            | CACGGCTTCGGCWTKVHGNDTACGCTGGGCTACTTGAT<br>CTGCGG |
| SD249-F14                            | CACGGCTTCGGCWTKVHGVHACGCTGGGCTACTTGAT<br>CTGCGG  |
| SD249-F15                            | CACGGCTTCGGCWTKVHGTGGACGCTGGGCTACTTGAT<br>CTGCGG |
| SD249-F16                            | CACGGCTTCGGCWTKTGGNDTACGCTGGGCTACTTGAT<br>CTGCGG |
| SD249-F17                            | CACGGCTTCGGCWTKTGGVHACGCTGGGCTACTTGAT<br>CTGCGG  |
| SD249-F18                            | CACGGCTTCGGCWTKTGGTGGACGCTGGGCTACTTGAT<br>CTGCGG |
| Reverse primers                      |                                                  |

|           |                                        |
|-----------|----------------------------------------|
| SD249-R1  | <b>GVCAHNAHNGCCGAAGCCGTGGTGAAATGG</b>  |
| SD249-R2  | <b>GVCAHNCDBGCCGAAGCCGTGGTGAAATGG</b>  |
| SD249-R3  | <b>GVCAHNCCAGCCGAAGCCGTGGTGAAATGG</b>  |
| SD249-R4  | <b>GVCCDBAHNGCCGAAGCCGTGGTGAAATGG</b>  |
| SD249-R5  | <b>GVCCDBCDBGCCGAAGCCGTGGTGAAATGG</b>  |
| SD249-R6  | <b>GVCCDBCCAGCCGAAGCCGTGGTGAAATGG</b>  |
| SD249-R7  | <b>GVCCCAAHNGCCGAAGCCGTGGTGAAATGG</b>  |
| SD249-R8  | <b>GVCCACDBGCCGAAGCCGTGGTGAAATGG</b>   |
| SD249-R9  | <b>GVCCACCA GCCGAAGCCGTGGTGAAATGG</b>  |
| SD249-R10 | <b>MAWAHNNDT GCCGAAGCCGTGGTGAAATGG</b> |
| SD249-R11 | <b>MAWAHNCDBGCCGAAGCCGTGGTGAAATGG</b>  |
| SD249-R12 | <b>MAWAHNCCAGCCGAAGCCGTGGTGAAATGG</b>  |
| SD249-R13 | <b>MAWCDBAHNGCCGAAGCCGTGGTGAAATGG</b>  |
| SD249-R14 | <b>MAWCDBCDBGCCGAAGCCGTGGTGAAATGG</b>  |
| SD249-R15 | <b>MAWCDBCCAGCCGAAGCCGTGGTGAAATGG</b>  |
| SD249-R16 | <b>MAWCCAAHNGCCGAAGCCGTGGTGAAATGG</b>  |
| SD249-R17 | <b>MAWCCACDBGCCGAAGCCGTGGTGAAATGG</b>  |
| SD249-R18 | <b>MAWCCACCA GCCGAAGCCGTGGTGAAATGG</b> |

| Supplementary Table 6: SD255 primers |                                                  |
|--------------------------------------|--------------------------------------------------|
| Forward primers                      |                                                  |
| SD255-F1                             | TTCGGCATGTTCCACCACGCTGGGC <b>NDTNDTNDT</b> TGCG  |
| SD255-F2                             | TTCGGCATGTTCCACCACGCTGGGC <b>NDTNDTVHGT</b> TGCG |
| SD255-F3                             | TTCGGCATGTTCCACCACGCTGGGC <b>NDTNDTTGGT</b> TGCG |
| SD255-F4                             | TTCGGCATGTTCCACCACGCTGGGC <b>NDTVHGNDT</b> TGCG  |
| SD255-F5                             | TTCGGCATGTTCCACCACGCTGGGC <b>NDTVHGVHGT</b> TGCG |
| SD255-F6                             | TTCGGCATGTTCCACCACGCTGGGC <b>NDTVHGTGGT</b> TGCG |
| SD255-F7                             | TTCGGCATGTTCCACCACGCTGGGC <b>NDTTGGNDT</b> TGCG  |
| SD255-F8                             | TTCGGCATGTTCCACCACGCTGGGC <b>NDTTGGVHGT</b> TGCG |
| SD255-F9                             | TTCGGCATGTTCCACCACGCTGGGC <b>NDTTGGTGGT</b> TGCG |
| Reverse primers                      |                                                  |
| SD255-R1                             | AGCACGACCCGAAAGCCGCA <b>AHNAHNAHNG</b> CCCAG     |
| SD255-R2                             | AGCACGACCCGAAAGCCGCA <b>CDBAHNAHNG</b> CCCAG     |
| SD255-R3                             | AGCACGACCCGAAAGCCGCA <b>CCAAHNAHNG</b> CCCAG     |
| SD255-R4                             | AGCACGACCCGAAAGCCGCA <b>AHNCDBAHNG</b> CCCAG     |
| SD255-R5                             | AGCACGACCCGAAAGCCGCA <b>CDBCDBAHNG</b> CCCAG     |
| SD255-R6                             | AGCACGACCCGAAAGCCGCA <b>CCACDBAHNG</b> CCCAG     |
| SD255-R7                             | AGCACGACCCGAAAGCCGCA <b>AHNCCAAHNG</b> CCCAG     |
| SD255-R8                             | AGCACGACCCGAAAGCCGCA <b>CDBCCAAHNG</b> CCCAG     |
| SD255-R9                             | AGCACGACCCGAAAGCCGCA <b>CCACCAAHNG</b> CCCAG     |

| Supplementary Table 7: SD286 primers |                                                     |
|--------------------------------------|-----------------------------------------------------|
| Forward primers                      |                                                     |
| SD286-F1                             | AGACTATAAGATTCAATCTGCC <b>GBCGBCGBC</b> CCACAC      |
| SD286-F2                             | AGACTATAAGATTCAATCTGCC <b>GBCWTKWTK</b> CCACAC      |
| SD286-F3                             | AGACTATAAGATTCAATCTGCC <b>GBCWTKGBC</b> CCACAC      |
| SD286-F4                             | AGACTATAAGATTCAATCTGCC <b>GBCGBCWTK</b> CCACAC      |
| SD286-F5                             | AGACTATAAGATTCAATCTGCC <b>WTKWTKWTK</b> CCACA<br>C  |
| SD286-F6                             | AGACTATAAGATTCAATCTGCC <b>WTKGBCGBC</b> CCACAC      |
| SD286-F7                             | AGACTATAAGATTCAATCTGCC <b>WTKGBCWTK</b> CCACAC      |
| SD286-F8                             | AGACTATAAGATTCAATCTGCC <b>WTKWTKGBC</b> CCACAC      |
| Reverse primers                      |                                                     |
| SD286-R1                             | GCTCTTAGCGAAGAAGCTAAATAGTGTGGG <b>GVC</b> GVCV<br>C |
| SD286-R2                             | GCTCTTAGCGAAGAAGCTAAATAGTGTGGG <b>MAWMAW</b><br>GVC |
| SD286-R3                             | GCTCTTAGCGAAGAAGCTAAATAGTGTGGG <b>GVCMAWG</b><br>VC |
| SD286-R4                             | GCTCTTAGCGAAGAAGCTAAATAGTGTGGG <b>MAWGVC</b><br>VC  |
| SD286-R5                             | GCTCTTAGCGAAGAAGCTAAATAGTGTGGG <b>MAWMAW</b><br>MAW |
| SD286-R6                             | GCTCTTAGCGAAGAAGCTAAATAGTGTGGG <b>GVC</b> GVC<br>AW |
| SD286-R7                             | GCTCTTAGCGAAGAAGCTAAATAGTGTGGG <b>MAWGVC</b><br>AW  |
| SD286-R8                             | GCTCTTAGCGAAGAAGCTAAATAGTGTGGG <b>GVCMAWM</b><br>AW |

| Supplementary Table 8: SD314 primers |                                           |
|--------------------------------------|-------------------------------------------|
| Forward primers                      |                                           |
| SD314-F1                             | CTAAGCAACTTGCACGAGATCGCC <b>NDTNDTNDT</b> |
| SD314-F2                             | CTAAGCAACTTGCACGAGATCGCC <b>NDTNDTVHG</b> |
| SD314-F3                             | CTAAGCAACTTGCACGAGATCGCC <b>NDTNDTTGG</b> |
| SD314-F4                             | CTAAGCAACTTGCACGAGATCGCC <b>VHGNDTNDT</b> |
| SD314-F5                             | CTAAGCAACTTGCACGAGATCGCC <b>VHGNDTVHG</b> |
| SD314-F6                             | CTAAGCAACTTGCACGAGATCGCC <b>VHGNDTTGG</b> |
| SD314-F7                             | CTAAGCAACTTGCACGAGATCGCC <b>TGGNDTNDT</b> |
| SD314-F8                             | CTAAGCAACTTGCACGAGATCGCC <b>TGGNDTVHG</b> |



|                 |                                   |
|-----------------|-----------------------------------|
| SD314-F9        | CTAAGCAACTTGCACGAGATCGCCTGGNDTTGG |
| Reverse primers |                                   |
| SD314-R1        | TTGCTGAGCGGCGCAHNAHNAHNGGCGATC    |
| SD314-R2        | TTGCTGAGCGGCGCCDBAHNAHNGGCGATC    |
| SD314-R3        | TTGCTGAGCGGCGCCAAHNAHNGGCGATC     |
| SD314-R4        | TTGCTGAGCGGCGCAHNAHNCDBGGCGATC    |
| SD314-R5        | TTGCTGAGCGGCGCCDBAHNCDBGGCGATC    |
| SD314-R6        | TTGCTGAGCGGCGCCAAHNCDBGGCGATC     |
| SD314-R7        | TTGCTGAGCGGCGCAHNAHNCCAGGCGATC    |
| SD314-R8        | TTGCTGAGCGGCGCCDBAHNCCAGGCGATC    |
| SD314-R9        | TTGCTGAGCGGCGCCAAHNCAGGCGATC      |

| Supplementary Table 9: SD337 primers |                                         |
|--------------------------------------|-----------------------------------------|
| Forward primers                      |                                         |
| SD337-F1                             | NDTNDTGGCNDTGGCCTGACAGAAACAACACTAGTGCCA |
| SD337-F2                             | NDTVHGGCNDTGGCCTGACAGAAACAACACTAGTGCCA  |
| SD337-F3                             | NDTTGGGGCNDTGGCCTGACAGAAACAACACTAGTGCCA |
| SD337-F4                             | VHGNDTGGCNDTGGCCTGACAGAAACAACACTAGTGCCA |
| SD337-F5                             | VHGVHGGCNDTGGCCTGACAGAAACAACACTAGTGCCA  |
| SD337-F6                             | VHGTGGGGCNDTGGCCTGACAGAAACAACACTAGTGCCA |
| SD337-F7                             | TGGNDTGGCNDTGGCCTGACAGAAACAACACTAGTGCCA |
| SD337-F8                             | TGGVHGGCNDTGGCCTGACAGAAACAACACTAGTGCCA  |
| SD337-F9                             | TGGTGGGGCNDTGGCCTGACAGAAACAACACTAGTGCCA |
| Reverse primers                      |                                         |
| SD337-R1                             | AGGCCAHNGCCAHNAHNGATGCCTGGTAGGT         |
| SD337-R2                             | AGGCCAHNGCCAHNCDBGATGCCTGGTAGGT         |
| SD337-R3                             | AGGCCAHNGCCAHNCCAGATGCCTGGTAGGT         |
| SD337-R4                             | AGGCCAHNGCCDBAHNGATGCCTGGTAGGT          |
| SD337-R5                             | AGGCCAHNGCCDBCDBGATGCCTGGTAGGT          |
| SD337-R6                             | AGGCCAHNGCCDBCCAGATGCCTGGTAGGT          |
| SD337-R7                             | AGGCCAHNGCCCAAHNGATGCCTGGTAGGT          |
| SD337-R8                             | AGGCCAHNGCCCCACDBGATGCCTGGTAGGT         |
| SD337-R9                             | AGGCCAHNGCCCCACCAAGATGCCTGGTAGGT        |

| Supplementary Table 10: SD347 primers |                                                  |
|---------------------------------------|--------------------------------------------------|
| Reverse primers                       |                                                  |
| SD347-R1                              | CTTCGGGGGTGATCAGAATAHNAHNAGTTGTTTCTGTC<br>AGGCCG |
| SD347-R2                              | CTTCGGGGGTGATCAGAATAHNCDBGATTTGTTTCTGTCA         |

|          |                                                  |
|----------|--------------------------------------------------|
|          | GGCCG                                            |
| SD347-R3 | CTTCGGGGGTGATCAGAATAHNCCAAGTTGTTTCTGTCA<br>GGCCG |
| SD347-R4 | CTTCGGGGGTGATCAGAATCDBAHNAGTTGTTTCTGTCA<br>GGCCG |
| SD347-R5 | CTTCGGGGGTGATCAGAATCDBCDBAGTTGTTTCTGTCA<br>GGCCG |
| SD347-R6 | CTTCGGGGGTGATCAGAATCDBCCAAGTTGTTTCTGTCA<br>GGCCG |
| SD347-R7 | CTTCGGGGGTGATCAGAATCCAAHNAGTTGTTTCTGTCA<br>GGCCG |
| SD347-R8 | CTTCGGGGGTGATCAGAATCCACDBAGTTGTTTCTGTCA<br>GGCCG |
| SD347-R9 | CTTCGGGGGTGATCAGAATCCACCAAGTTGTTTCTGTCA<br>GGCCG |

### Agar-plate and lysate screening of luciferin analogues

Library DNA was transformed into BL21 or T7 Express *lysY E. coli* (New England BioLabs) and plated following the protocol in Jones *et al.*<sup>1</sup> The agar contained luciferin analogues (plated at concentrations ranging from 100–200  $\mu$ M). Plates were incubated at 37 °C and imaged ~12 h later. Light-emitting colonies were picked and grown for further analyses following the protocol described in Jones *et al.*<sup>1</sup>

### Complete analogue/mutant luciferase screen

DNA from functional and sequentially diverse mutants was transformed into *E. coli* BL21. Cells were expanded under antibiotic. Aliquots were stored as glycerol stocks at -80 °C. Luciferin aliquots (10 mM in 100 mM phosphate buffer (pH 7.8)) were prepared and stored at -80 °C. Tubes of LB-Kan media (1 mL) were inoculated with each glycerol stock and incubated at 37 °C overnight. The overnight culture was used to inoculate (150  $\mu$ L) three 5 mL cultures per mutant luciferase. These cultures were grown to an OD of ~0.8, induced with 500  $\mu$ M IPTG for 2 h at 30 °C, then pelleted. Cell pellets were lysed in 600  $\mu$ L of lysis buffer (50 mM Tris•HCl, 500 mM NaCl, 0.5% (v/v) Tween, 5 mM MgCl<sub>2</sub>, pH = 7.4). The cell lysate was spread across six wells (90  $\mu$ L/well) on six different 96-well black plates. Native Fluc was included in each screen as a check on compound integrity. To each well, 10  $\mu$ L of 10 mM luciferin and 1 mM ATP were added and the plate imaged for 1-60 s. This process was repeated until all 12 compounds were imaged with all 159 luciferase mutants.

### In silico screens

Scripts to search for orthogonal sets were written in Python3 and executed on either a MacBook Pro (for testing), or the High Performance Computing Cluster at UC Irvine (<https://hpc.oit.uci.edu/>). Searches for orthogonal pairs were run on 16 cores. Searches for triplet sets were run on 32 or 64 cores. The Python code and further documentation is freely available online: <https://www.chem.uci.edu/~jpresche/resources.html>. See the

Supplementary Note for additional information regarding the mathematical evaluation of orthogonality.

### **Analyzing orthogonality as a function of diversity**

Data were generated using Python3 in the Jupyter Notebook environment (code available at <https://www.chem.uci.edu/~jpresche/resources.html>). For each point on the surface, the algorithm chose 5 random subsets of luciferins and luciferases from the pool of enzyme-substrate data. These subsets were then subjected to the *in silico* screen (see above) and the averages of the top 1,000 orthogonality scores were recorded. All scores were averaged if the total number was less than 1,000. The five subset averages were then further averaged together to give the value of the point.

### **Mammalian plasmid construction**

To express the mutant luciferases in mammalian cells, the luciferase gene was amplified and inserted into pBMN-IRES-GFP<sup>2</sup>. The following primers were used in the amplification:

5'-ataacgcgatggaagatgccaaaacattaaga-3' and

5'-gagagggatgcattattacacggcgatcttgcc-3'

The PCR product was digested with *Nsi*I and *Mlu*I (New England BioLabs) and inserted into the pBMN-IRES-GFP vector with T4 ligase (New England BioLabs). Sequencing analysis was used to confirm the plasmid construct.

### **Mammalian cell culture**

DB7 cells (courtesy of the Contag laboratory, Stanford) were cultured in DMEM (Corning) supplemented with 10% (vol/vol) fetal bovine serum (FBS, Life Technologies), penicillin (100 U/mL), and streptomycin (100 µg/mL). Cells were maintained in a 5% CO<sub>2</sub> water-saturated incubator at 37 °C. To create stable lines expressing mutant luciferases, DB7 cells were transduced with ecotropic retrovirus (Phoenix packaging system) as previously described.<sup>3</sup> Transduced cells were then treated with puromycin (10 µg/mL) and ultimately sorted via FACS at the Institute for Immunology Flow Cytometry Core (UCI).

### **Mammalian cell imaging with luciferase mutants**

DB7 cells stably expressing Fluc or mutant luciferases were added to black 96-well plates (1 x 10<sup>5</sup> cells per well). A stock solution of luciferin (5 mM in PBS) was added to each well (500 µM final concentration). Sequential imaging was performed as described in the General bioluminescence imaging section.

### **In vivo imaging of orthogonal luciferase-luciferin pairs**

FVB/NJ mice (The Jackson Laboratory) received subcutaneous dorsal injections of 2 x 10<sup>6</sup> or 6.5 x 10<sup>6</sup> DB7 mutant luciferase expressing cells. After 24 h, animals received an i.p. injection of luciferin (67 mM or 100 mM, 100 µL per mouse). Mice were anesthetized (2% isoflurane) and placed on the warmed (37 °C) IVIS stage for imaging. Bioluminescent photons were quantified for the designated regions of interest. Prior to injecting a second luciferin, mice were imaged for residual bioluminescent signal. Images were acquired every other day over 5 d.

## General synthetic methods

All reagents purchased from commercial suppliers were of analytical grade and used without further purification. 4,5-Dichloro-1,2,3-dithiazolium chloride, was prepared as previously reported<sup>4</sup>. Reaction progress was monitored by thin-layer chromatography on EMD 60 F254 plates, visualized with UV light, ceric ammonium molybdate (CAM), chloranil, or KMnO<sub>4</sub> stain. Compounds were purified via flash column chromatography using SiliaFlash F60 60 Å, 230-400 mesh silica gel (SiliCycle), unless otherwise stated. HPLC purifications were performed on a Varian ProStar equipped with a 325 Dual Wavelength UV-Vis detector. Semi-preparative runs were performed using an Agilent Prep-C18 Scalar column (9.4 x 150 mm, 5 μm), preparative runs were performed using an Agilent Eclipse XD8-C18 PrepHT column (21.2 x 250 mm 7 μm). Anhydrous solvents were dried by passage over neutral alumina. Reaction vessels were either flame or oven dried prior to use. NMR spectra were acquired with Bruker Advanced spectrometers. All spectra were acquired at 298 K. <sup>1</sup>H-NMR spectra were acquired at either 500 or 400 MHz, and <sup>13</sup>C-NMR spectra were acquired at 125 MHz. Coupling constants (*J*) are provided in Hz and chemical shifts are reported in ppm relative to either residual non-deuterated NMR solvent, calculated reference, or to a methanol external reference. Low and high-resolution electrospray ionization (ESI) mass spectra were collected at the University of California Irvine Mass Spectrometry Facility.

## Synthetic Procedures

4'-BrLuc, 7'-BrLuc, 4'-MeLuc, 7'-MeLuc, 4'-MorphoLuc, 7'-MorphoLuc, 7'-DMAMeLuc and 7'-MorPipLuc were prepared as previously described in Steinhardt *et al.*<sup>5</sup> and Jones *et al.*<sup>1</sup>

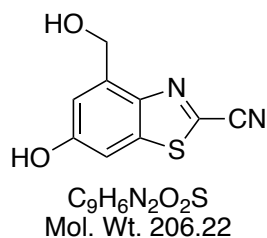

### 6-hydroxy-4-(hydroxymethyl)benzo[d]thiazole-2-carbonitrile

(S1). Following the procedure of Kulangiappar *et al.*,<sup>6</sup> 6-acetoxy-4-[bromomethyl]-1,3-benzothiazole-2-carbonitrile<sup>1</sup> (0.150 g, 0.482 mmol), was dissolved in MeCN (10 mL) and stirred at rt in a round bottom flask. Sodium nitrate was dissolved in H<sub>2</sub>O (10 mL) and added to the reaction mixture. The flask was flushed with N<sub>2</sub> and then stirred at 80 °C for 22 h. The volatiles were evaporated *in vacuo*, and the resulting aqueous solution was diluted with 1 M

NaHSO<sub>4</sub> (50 mL) and extracted with EtOAc (3 x 50 mL). The organic layers were combined, washed with brine (1 x 50 mL) and, dried over MgSO<sub>4</sub>. The solution was filtered and concentrated *in vacuo*. The resulting white solid was carried on without further purification.

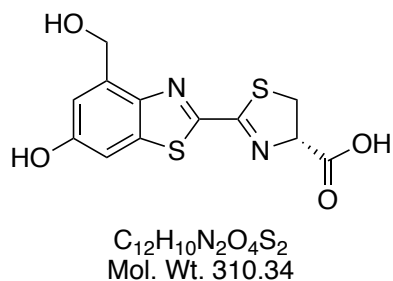

**(S)-2-(6-hydroxy-4-(hydroxymethyl)benzo[d]thiazol-2-yl)-4,5-dihydrothiazole-4-carboxylic acid (4'-MeOHLuc).**

**S1** was dissolved in MeCN (5 mL), added to a scintillation vial, and stirred under  $N_2$ .  $K_2CO_3$  (0.067 g, 0.49 mmol) and D-cysteine·HCl·H<sub>2</sub>O (0.086 g, 0.49 mmol) were dissolved in H<sub>2</sub>O (1 mL) then added to the reaction mixture. When TLC analysis indicated full consumption of starting material, the reaction mixture was concentrated *in vacuo*. The resulting aqueous solution was diluted with H<sub>2</sub>O (25 mL), acidified to pH 2, and extracted with EtOAc (5 x 25 mL). The organic layers were combined, dried over  $MgSO_4$ , filtered, and concentrated *in vacuo* to provide 4'-MeOHLuc, as a dark orange solid (0.087 g, 60%). <sup>1</sup>H NMR (400 MHz, D<sub>2</sub>O)  $\delta$  7.14 (d,  $J$  = 2.2, 1H), 6.99 (d,  $J$  = 2.2, 1H), 5.20 (dd,  $J$  = 8.3,  $J$  = 9.7, 1H), 4.93 (app dd,  $J$  = 14.0,  $J$  = 20.8, 2H), 3.81 (app t,  $J$  = 10.6, 1H), 3.61 (dd,  $J$  = 8.4,  $J$  = 11.2, 2H); <sup>13</sup>C NMR (125 MHz, D<sub>2</sub>O)  $\delta$  177.8, 165.9, 157.6, 155.8, 144.0, 137.4, 136.3, 115.0, 105.8, 80.1, 60.4, 36.4. HRMS (ESI<sup>-</sup>) calcd for  $C_{12}H_9O_4N_2S_2$  [ $M-H$ ]<sup>-</sup> = 309.0004, found 308.9994.

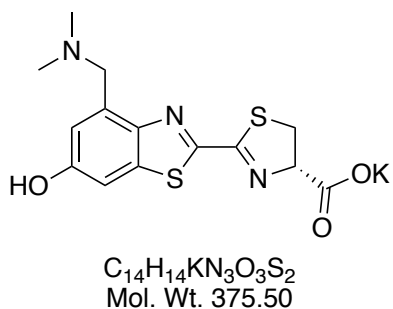

**(S)-2-(4-((dimethylamino)methyl)-6-hydroxybenzo[d]thiazol-2-yl)-4,5-dihydrothiazole-4-carboxylate potassium salt (4'-DMAMeLuc).**

To a stirred solution of 6-acetoxy-4-[bromomethyl]-1,3-benzothiazole-2-carbonitrile<sup>1</sup> (0.196 g, 0.630 mmol) in MeCN (2 mL) was added  $K_2CO_3$  (0.261 g, 1.89 mmol) in H<sub>2</sub>O (1 mL) and dimethylamine (40 wt. % in H<sub>2</sub>O, 0.24 mL, 1.89 mmol). When TLC analysis indicated full consumption of starting material (~30 min), D-cysteine·HCl·H<sub>2</sub>O (0.111 g, 0.630 mmol) was added to the reaction mixture. When TLC indicated that the intermediate cyanobenzothiazole was fully consumed, the reaction mixture was concentrated *in vacuo* to yield the potassium salt as a yellow solid (0.13 g, 54%). The product was purified via HPLC (preparative, reversed phase) with the following elution protocol: 100% H<sub>2</sub>O for 5 min, followed by a gradient of 0-90% MeOH in H<sub>2</sub>O for 15 min. The flow rate was 20 mL/min. <sup>1</sup>H NMR (500 MHz, CD<sub>3</sub>OD)  $\delta$  7.24 (s, 1H), 7.04 (s, 1H), 5.16 (t,  $J$  = 9.3, 1H), 4.04 (app dd,  $J$  = 13.2,  $J$  = 20.8, 2H), 3.68 (app p,  $J$  = 9.1,  $J$  = 11, 2H) 2.34 (s, 6H); <sup>13</sup>C NMR (125 MHz, CD<sub>3</sub>OD)  $\delta$  177.6, 165.8, 159.2, 158.3, 147.7, 139.3, 134.6, 119.1, 106.9, 83.2, 59.6, 45.3, 37.1. HRMS (ESI<sup>-</sup>) calcd for  $C_{13}H_{14}N_3OS_2$  [ $M-CO_2K$ ]<sup>-</sup> = 292.0578, found 292.0573.

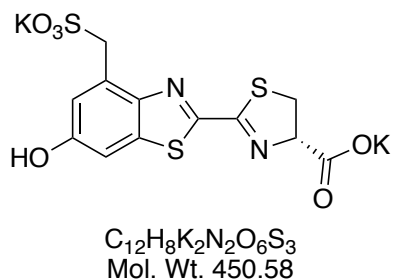

**(S)-2-(6-hydroxy-4-(sulfonatomethyl)benzo[d]thiazol-2-yl)-4,5-dihydrothiazole-4-carboxylate potassium salt (4'-SO<sub>3</sub>HLuc).**

6-Acetoxy-4-[bromomethyl]-1,3-benzothiazole-2-carbonitrile<sup>1</sup> (0.200 g, 0.643 mmol) was dissolved in acetone (5 mL) and stirred in a round bottom flask. A solution of sodium sulfite (0.243 g, 1.93 mmol) in H<sub>2</sub>O (5 mL) was then added. The reaction mixture was then stirred at rt for 24 h. The acetone was removed *via* rotary evaporation. K<sub>2</sub>CO<sub>3</sub> (0.090, 0.65 mmol) and D-cysteine•HCl•H<sub>2</sub>O (0.114 g, 0.649 mmol) were dissolved in H<sub>2</sub>O (1 ml) then added to the reaction mixture. The reaction was stirred at rt for 18 h. Upon completion, the reaction mixture was concentrated *in vacuo* to yield the potassium salt as a yellow solid (0.13 g, 45%). If necessary, the product was purified by HPLC (preparative, reversed phase) with the following elution protocol: 100% H<sub>2</sub>O for 5 min, followed by a gradient of 0-90 % MeCN in H<sub>2</sub>O for 15 min. The flow rate was 20 mL/min. <sup>1</sup>H NMR (500 MHz, D<sub>2</sub>O) δ 7.29 (d, *J* = 2.4, 1H), 7.11 (d, *J* = 2.4, 1H), 5.22 (dd, *J* = 8.2, *J* = 9.8, 2H), 4.63 (s, 2H), 3.83 (dd, *J* = 9.9, *J* = 11.1, 1H), 3.61 (dd, *J* = 8.2, *J* = 11.1, 1H). <sup>13</sup>C NMR (125 MHz, solvent CD<sub>3</sub>OD) δ 177.6, 165.7, 158.5, 158.2, 148.1, 139.0, 131.3, 119.2, 106.7, 83.1, 53.5, 37.3. HRMS (ESI<sup>-</sup>) calcd C<sub>12</sub>H<sub>9</sub>N<sub>2</sub>O<sub>6</sub>S<sub>3</sub> [M-H]<sup>-</sup> = 372.9623, found 372.9619.

## References

1. Jones, K.A. et al. Orthogonal Luciferase-Luciferin Pairs for Bioluminescence Imaging. *J. Am. Chem. Soc.* **139**, 2351-2358 (2017).
2. Liu, H.P. et al. Cancer stem cells from human breast tumors are involved in spontaneous metastases in orthotopic mouse models. *Proc. Natl. Acad. Sci. U.S.A.* **107**, 18115-18120 (2010).
3. Helms, M.W., Prescher, J.A., Cao, Y.A., Schaffert, S. & Contag, C.H. IL-12 enhances efficacy and shortens enrichment time in cytokine-induced killer cell immunotherapy. *Cancer Immunol. Immunother.* **59**, 1325-1334 (2010).
4. McCutcheon, D.C., Porterfield, W.B. & Prescher, J.A. Rapid and scalable assembly of firefly luciferase substrates. *Org. Biomol. Chem.* **13**, 2117-2121 (2015).
5. Steinhardt, R.C. et al. Brominated luciferins are versatile bioluminescent probes. *ChemBioChem* **18**, 96 (2017).
6. Kulangiappar, K., Kulandainathan, M.A. & Raju, T. Conversion of Benzylic Bromides to Benzaldehydes Using Sodium Nitrate As an Oxidant. *Ind. Eng. Chem. Res.* **49**, 6670-6673 (2010).

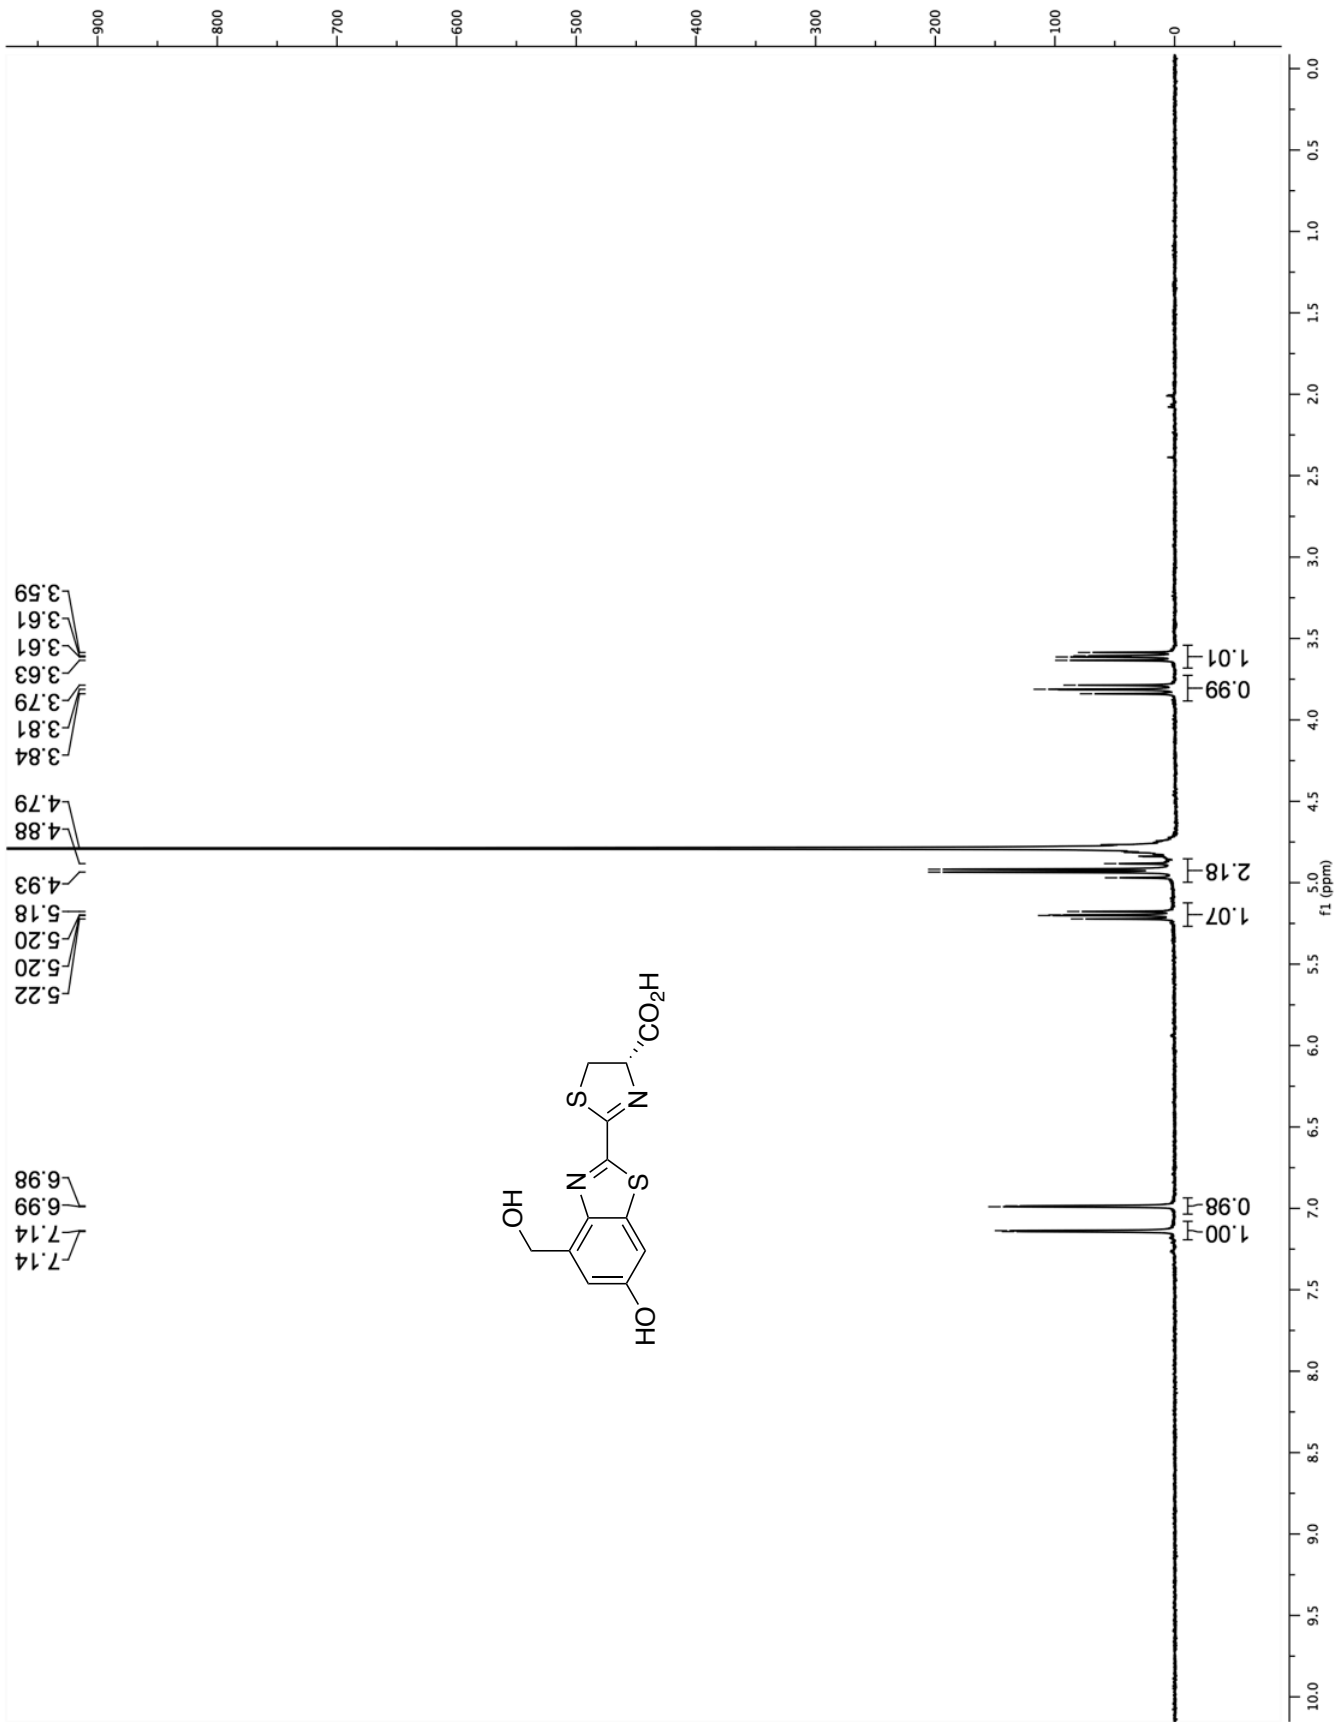

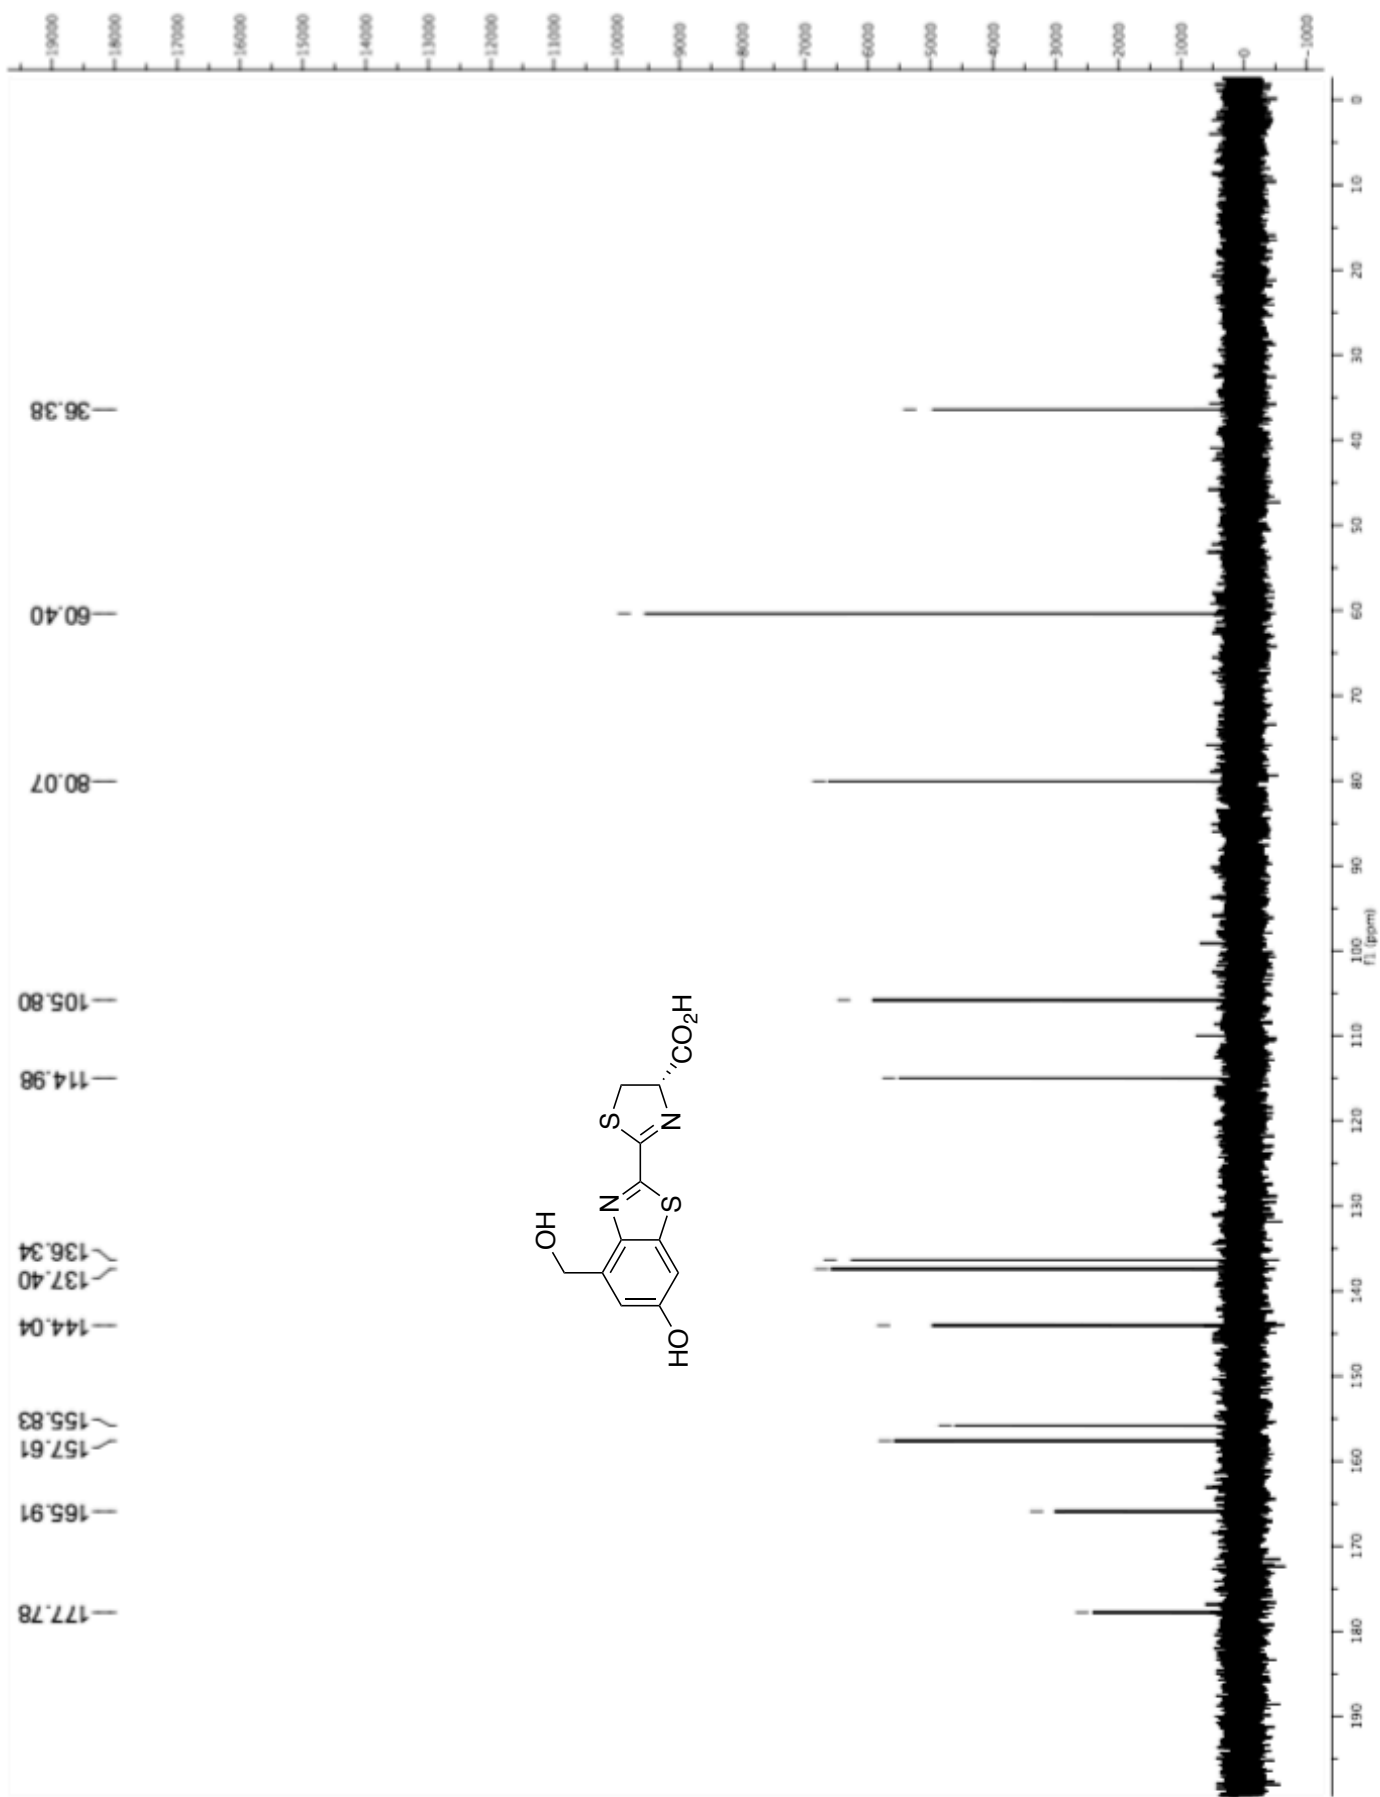



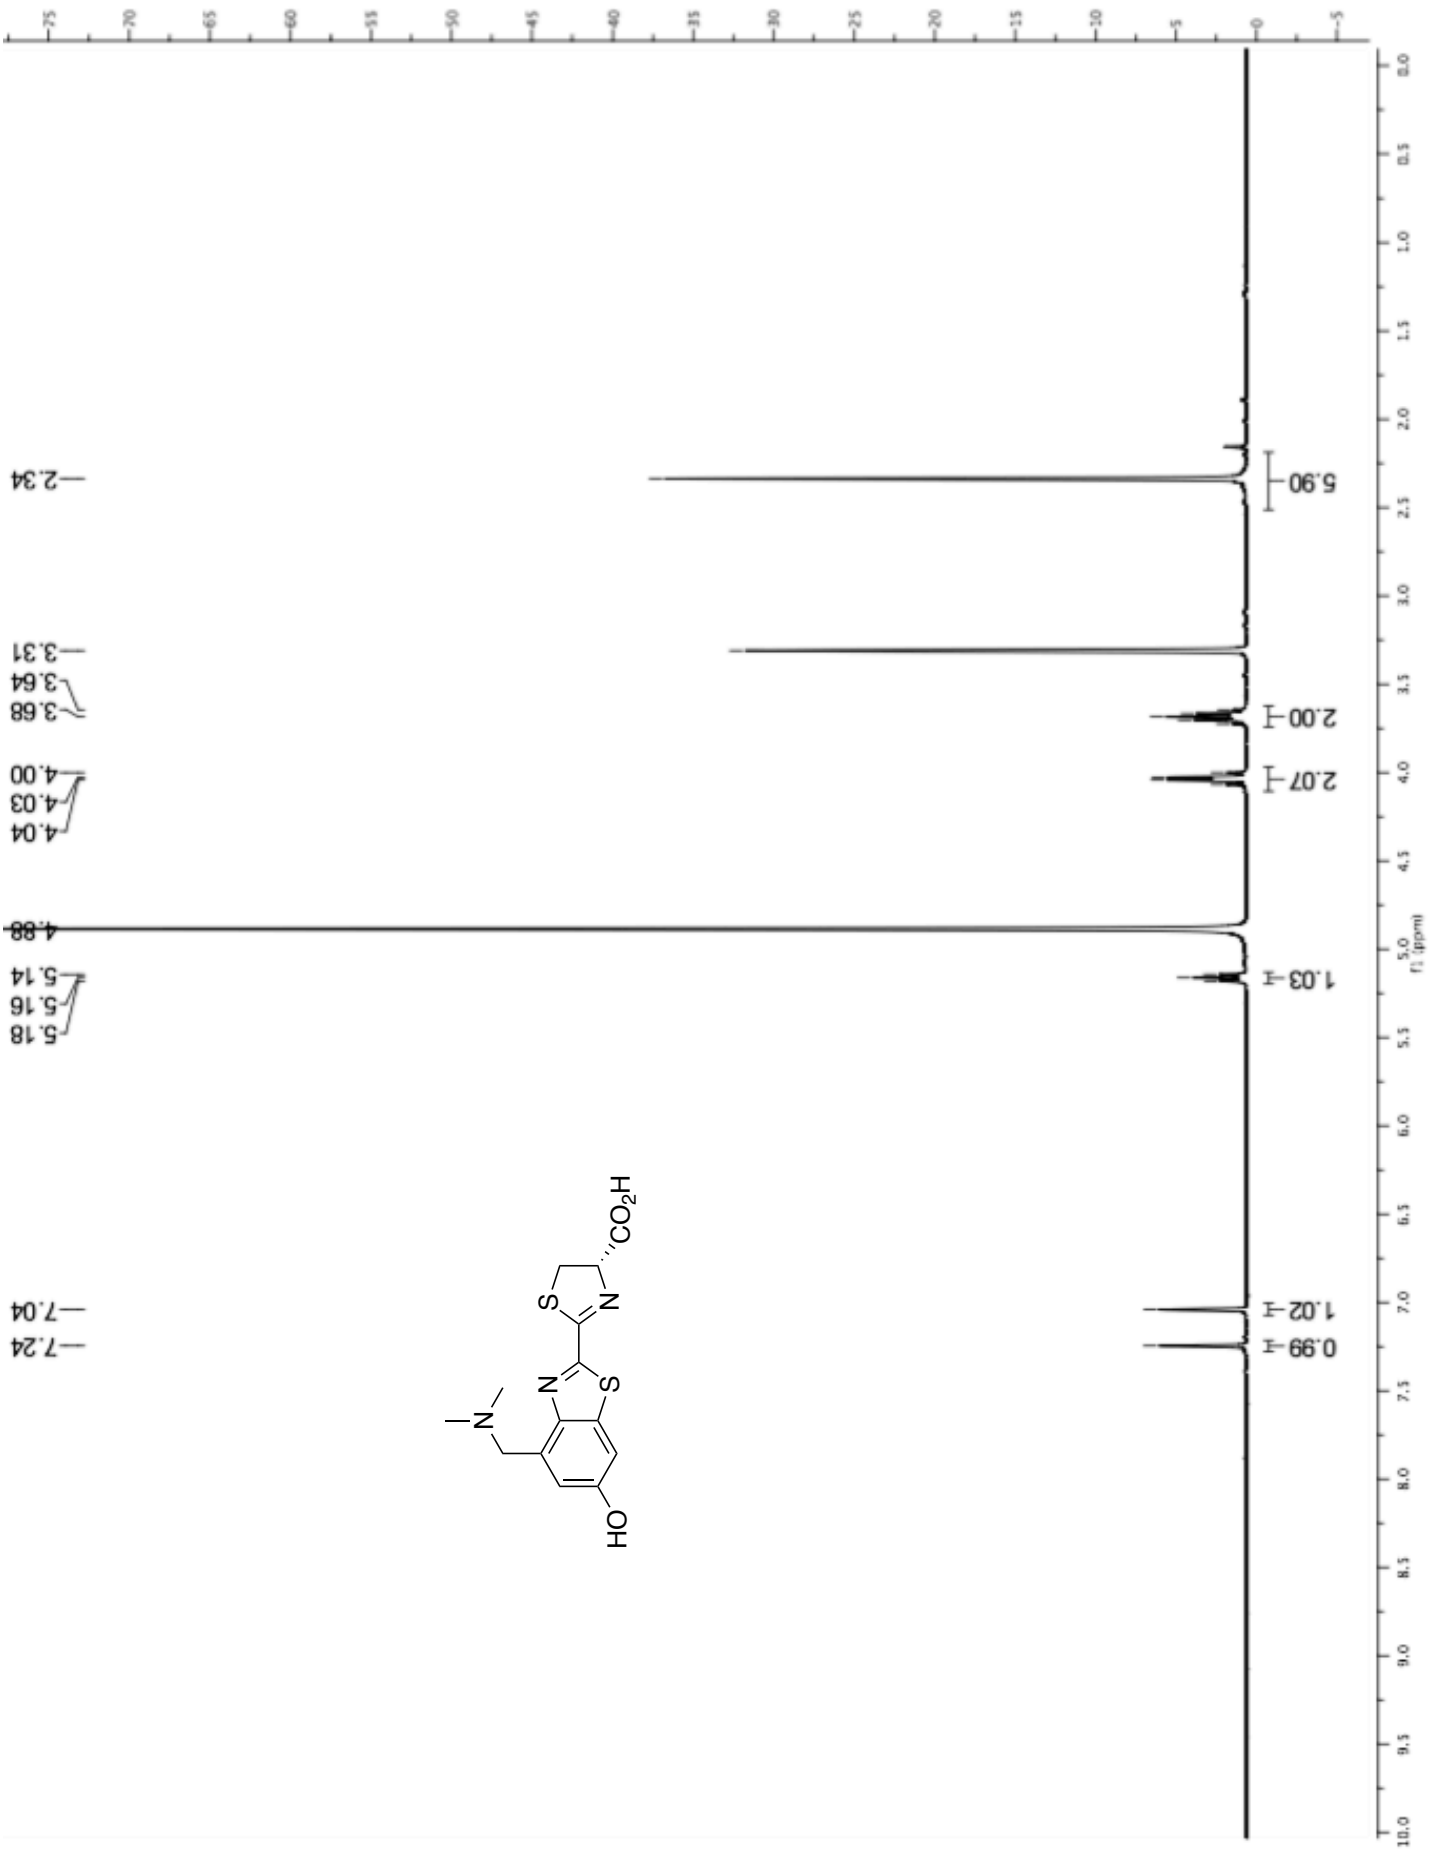

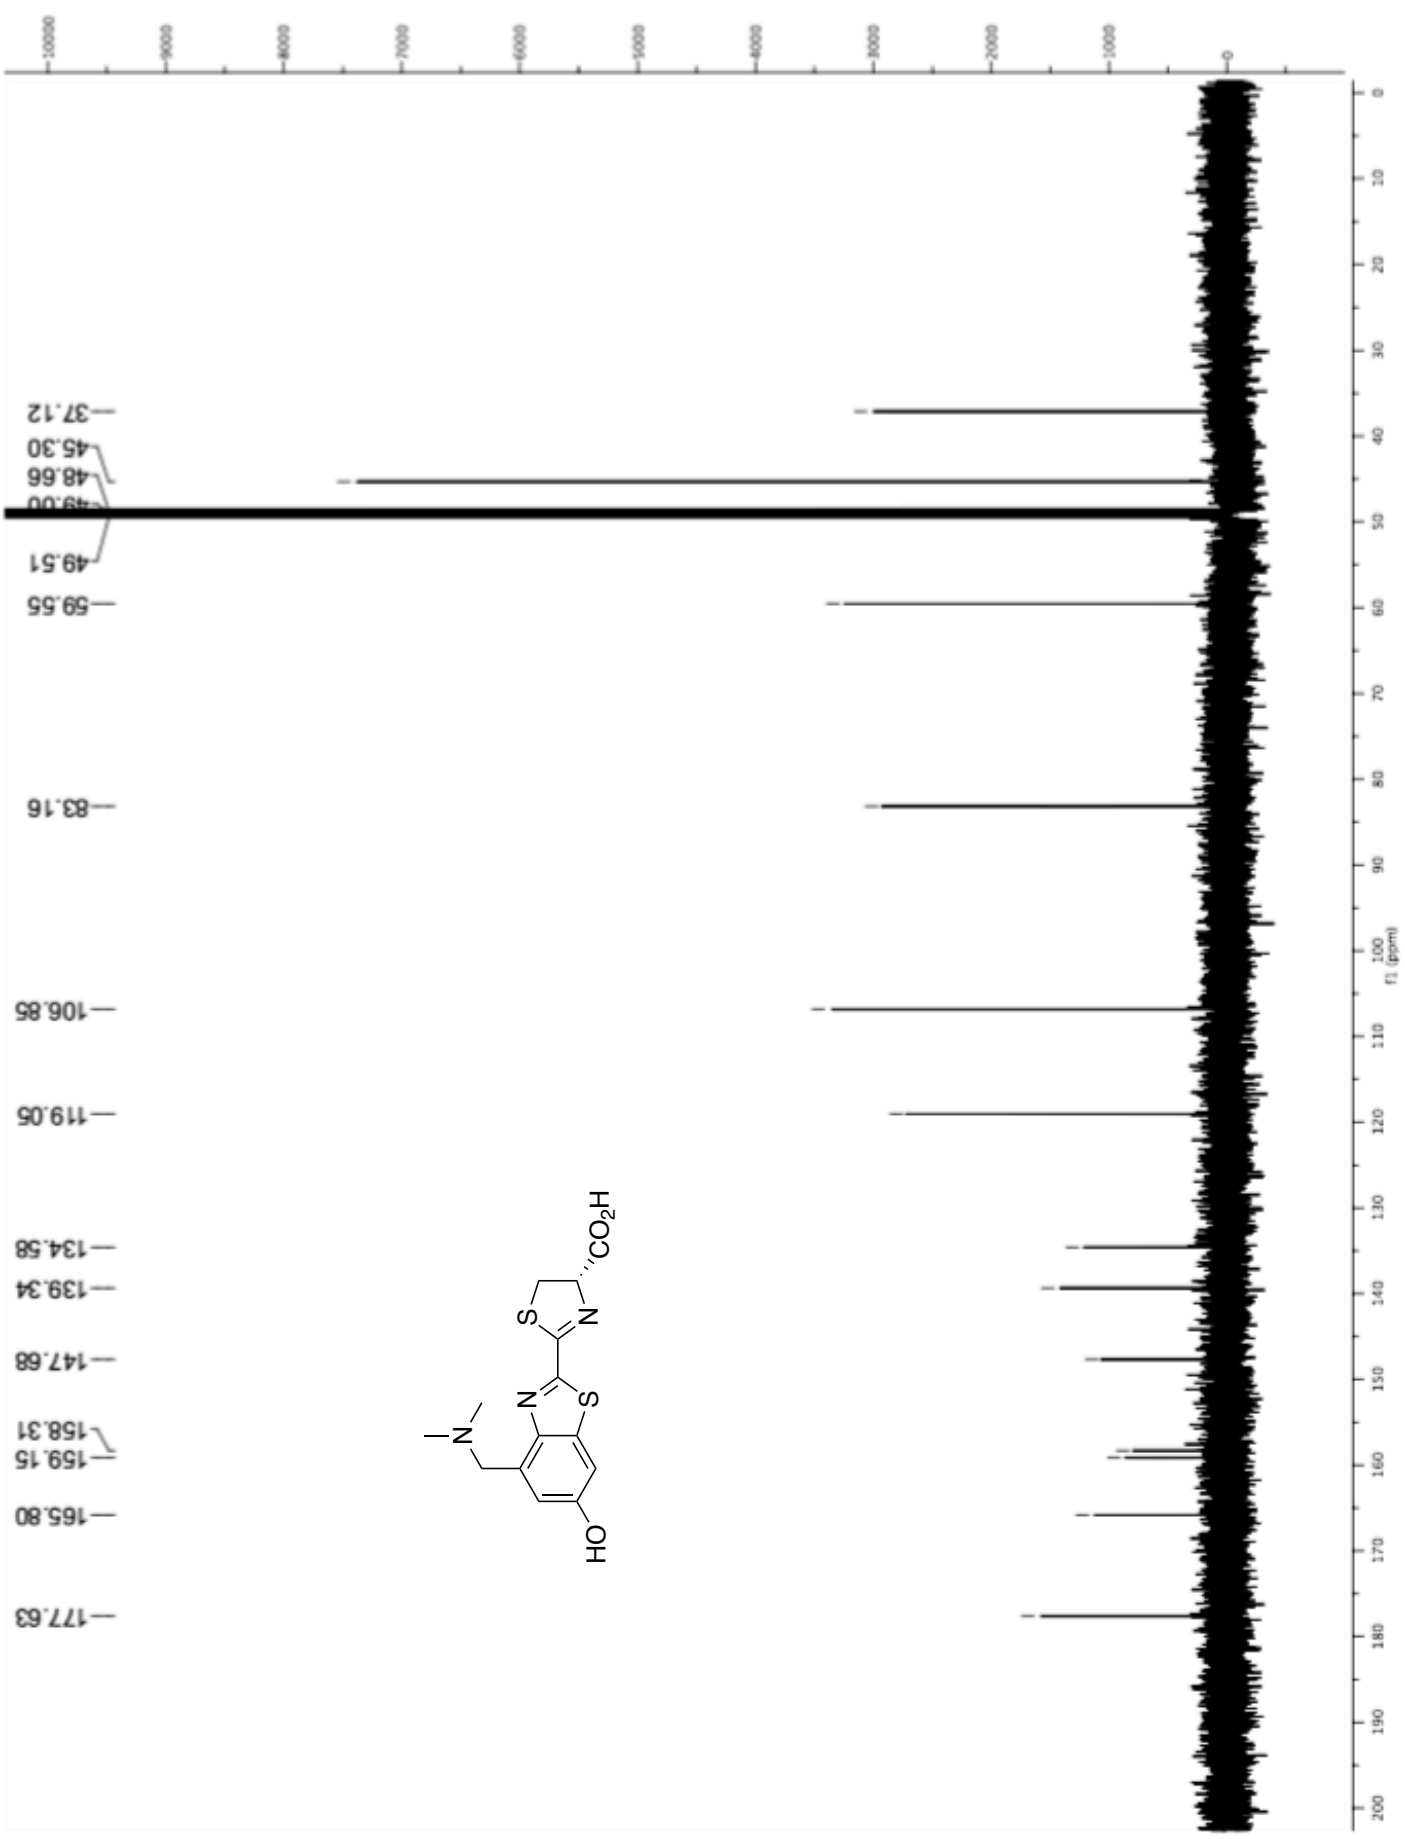

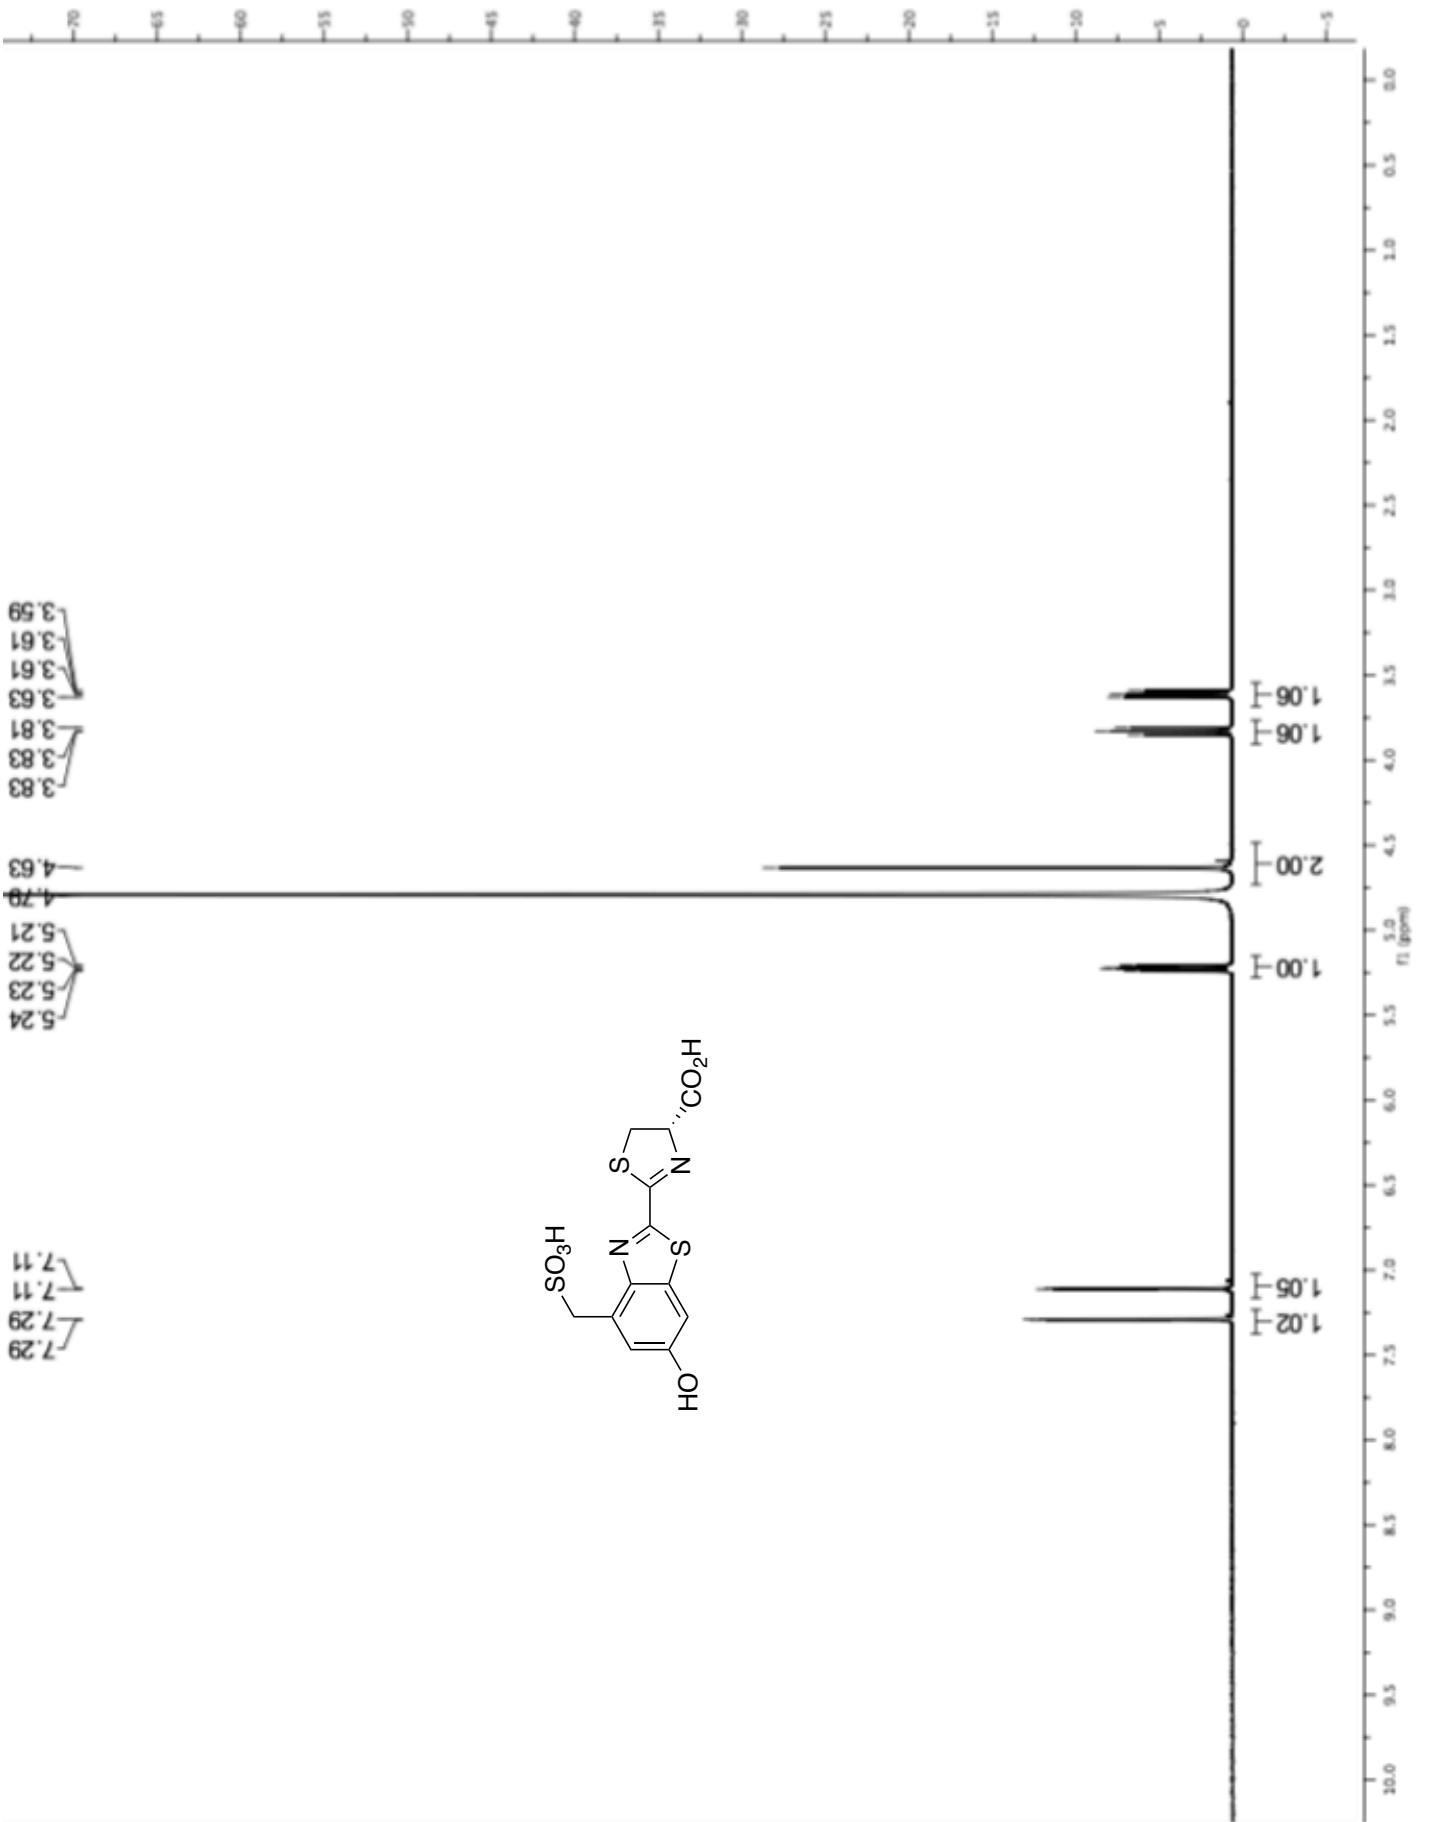

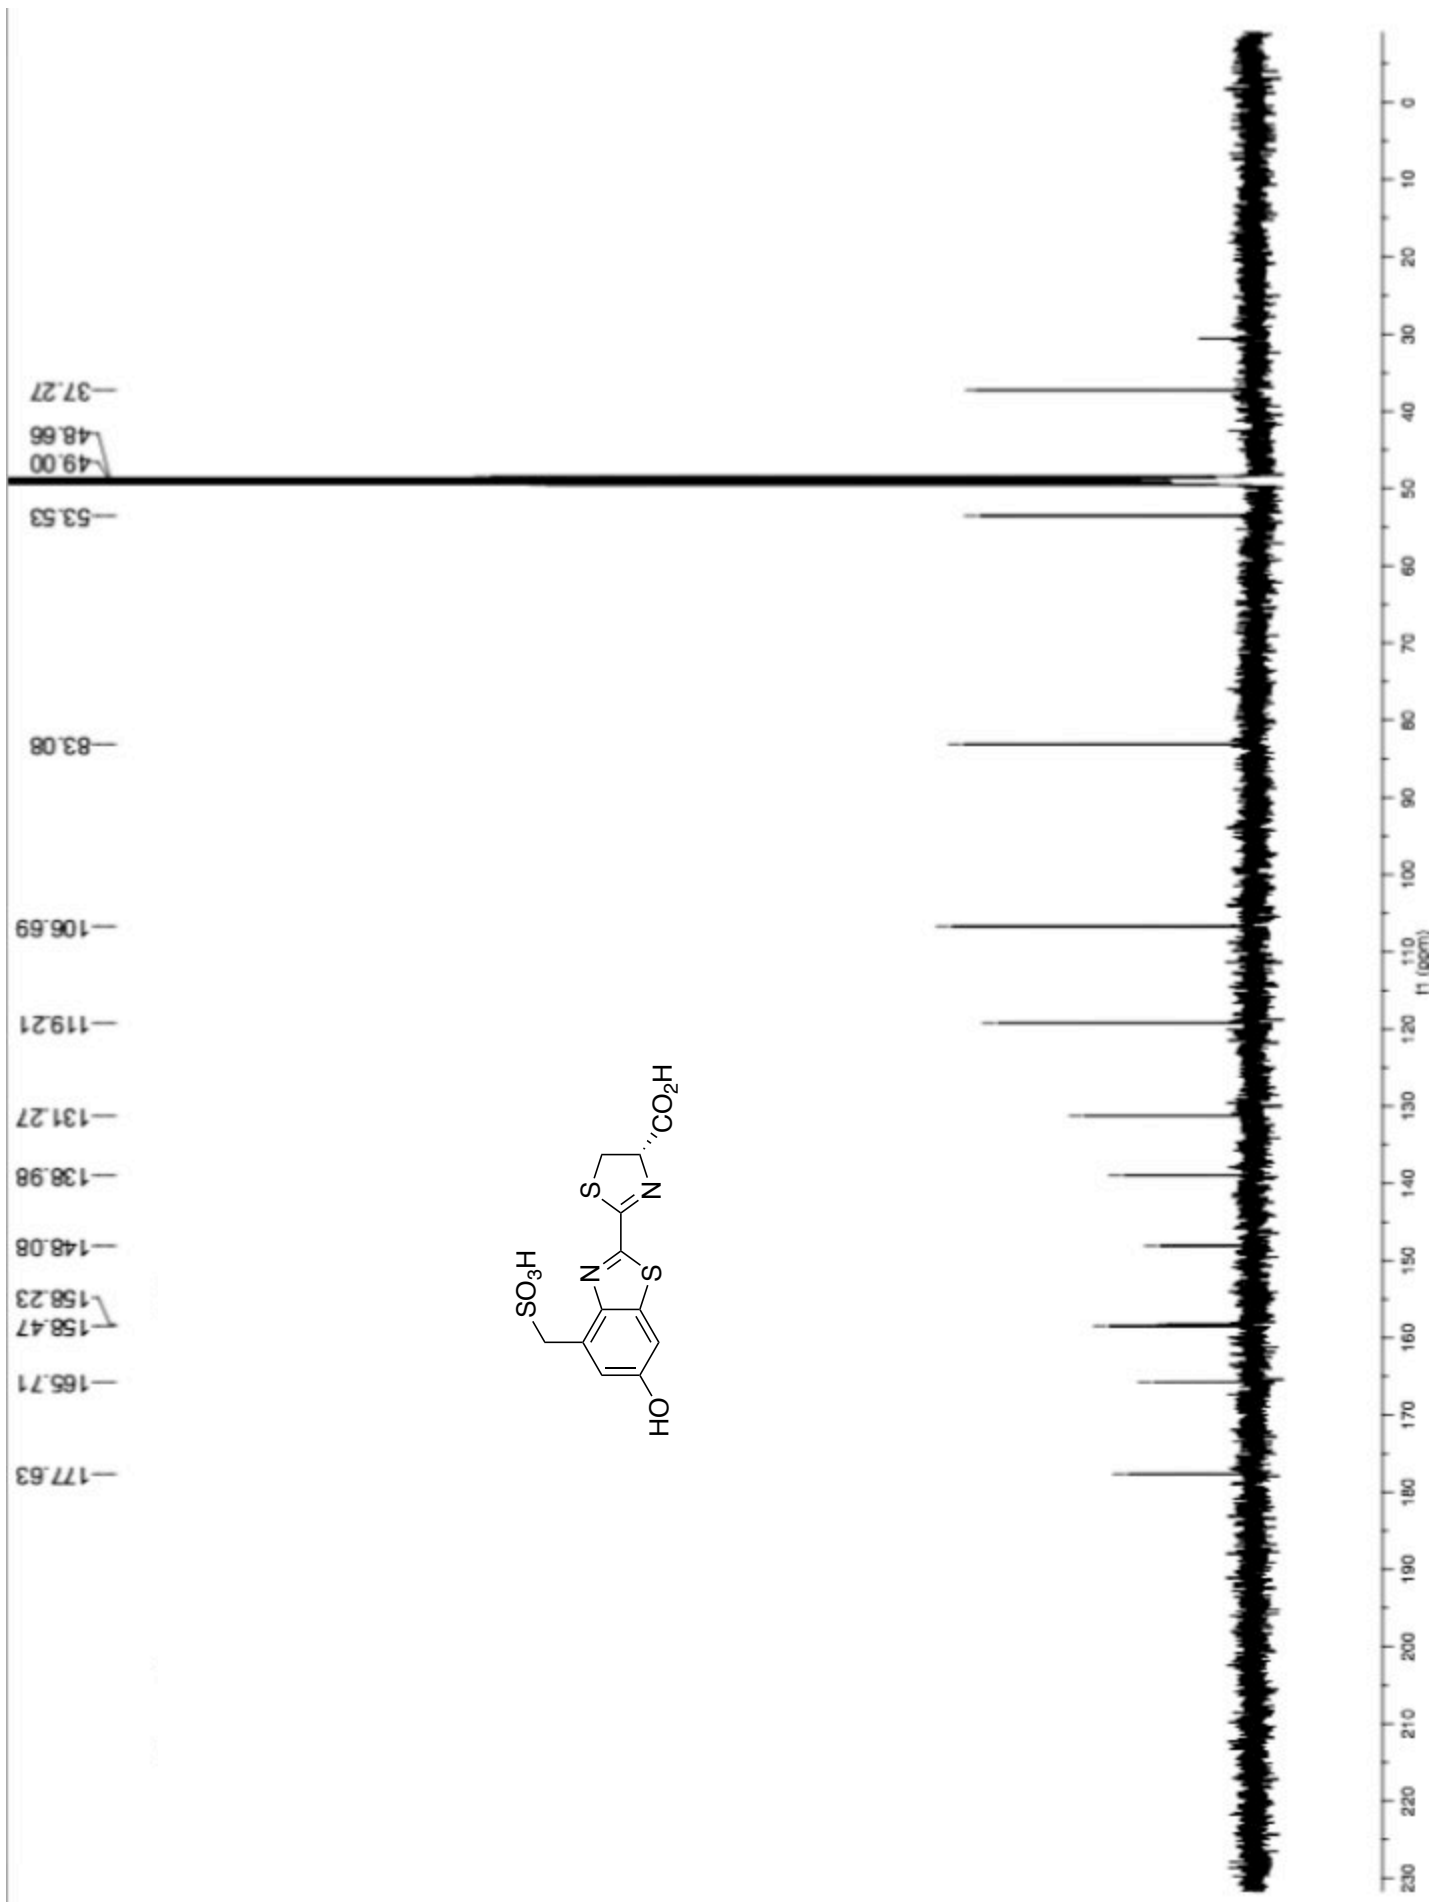

Supplement: oc7b00394_si_001.pdf [file oc7b00394_si_001.pdf]
